# Supplementary material for: A paleoprecipitation and paleotemperature reconstruction of the Last Interglacial in the southeastern Alps
Source: Copernicus journal article supplement (doi:10.5194/cp-19-1177-2023), 2023-06-15
Supplement: Supplementary file 1 [file cp-19-1177-2023-supplement.zip]

Archive with 2 entries (2 files):
- cp-19-1177-2023-supplement-title-page.pdf
- SEALPS-supplement.xlsx
