# Supplementary material for: A paleoprecipitation and paleotemperature reconstruction of the Last Interglacial in the southeastern Alps
Source: Copernicus journal article supplement (doi:10.5194/cp-19-1177-2023), 2023-06-15
Supplement: Supplementary file 1 [file cp-19-1177-2023-supplement.zip › cp-19-1177-2023-supplement-title-page.pdf]

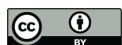

*Supplement of*

**A paleoprecipitation and paleotemperature reconstruction  
of the Last Interglacial in the southeastern Alps**

**Charlotte Honiat et al.**

*Correspondence to:* Charlotte Honiat ([charlotte.honiat@orange.fr](mailto:charlotte.honiat@orange.fr))

- [cp-19-1177-2023-supplement-title-page.pdf](#)
- [SEALPS-supplement.xlsx](#)

The copyright of individual parts of the supplement might differ from the article licence.
