# Supplementary material for: A paleoprecipitation and paleotemperature reconstruction of the Last Interglacial in the southeastern Alps
Source: Copernicus journal article supplement (doi:10.5194/cp-19-1177-2023), 2023-06-15
Supplement: Supplementary file 1 [file cp-19-1177-2023-supplement.zip › SEALPS-supplement.xlsx]

## Sheet: OBI14
z (distance from top in mm)	Modelled age (year BP)	± 2σ (year BP)	δ13C	δ18O
155	112644	1429.8	-6.17131	-7.09507
155.2	112671	1423.8	-6.12673	-7.12511
155.4	112698	1417.6	-5.9299	-7.06042
155.6	112726	1411.4	-5.69259	-7.45867
155.8	112753	1405.4	-5.96207	-7.06245
156	112781	1399.4	-5.95656	-6.87122
156.2	112808	1393.4	-5.7251	-6.78135
156.4	112836	1387.4	-5.86764	-6.79537
156.6	112863	1381.4	-5.46656	-6.59608
156.8	112891	1375.4	-5.54816	-6.60495
157	112918	1369.4	-5.58028	-6.75682
157.2	112945	1363.8	-5.54876	-6.65075
157.4	112973	1358.2	-6.07775	-6.91958
157.6	113000	1352.6	-6.14623	-6.88803
157.8	113027	1347	-5.99902	-7.03753
158	113055	1341.4	-6.34311	-7.02543
158.2	113083	1335.8	-6.57413	-7.24748
158.4	113110	1330.2	-6.63319	-7.41517
158.6	113138	1324.8	-6.97688	-7.58424
158.8	113165	1319.4	-6.81677	-7.52662
159	113192	1314.2	-5.9944	-7.2225
159.2	113220	1309	-5.7612	-6.98473
159.4	113248	1303.6	-5.53008	-6.82864
159.6	113275	1298.4	-5.87617	-6.58103
159.8	113303	1293.2	-6.63743	-6.71479
160	113330	1288.2	-5.55275	-6.38457
160.2	113358	1283.4	-5.36172	-6.7054
160.4	113385	1278.6	-5.30112	-7.02673
160.6	113412	1273.8	-5.57554	-7.15616
160.8	113440	1269	-6.15359	-7.41419
161	113468	1264	-6.49735	-7.50571
161.2	113495	1259.2	-6.71521	-7.33225
161.4	113522	1254.8	-6.0877	-7.12709
161.6	113550	1250.4	-5.29936	-7.03933
161.8	113577	1246	-4.80003	-6.98928
162	113605	1241.8	-5.09682	-7.01958
162.2	113632	1237.6	-4.87682	-7.01049
162.4	113659	1233.4	-5.26594	-7.27532
162.6	113687	1229.4	-5.27141	-7.29324
162.8	113714	1225.4	-5.47569	-7.26436
163	113741	1221.4	-5.31263	-7.09244
163.2	113769	1217.4	-5.1886	-7.15173
163.4	113796	1213.6	-5.1398	-7.18438
163.6	113824	1209.8	-5.08936	-6.97224
163.8	113851	1206	-5.29127	-6.9335
164	113879	1202.2	-5.69172	-7.15085
164.2	113906	1198.8	-5.7368	-7.01778
164.4	113934	1195.4	-5.30608	-6.82737
164.6	113961	1192	-5.32666	-6.85226
164.8	113988	1188.8	-5.38579	-6.89141
165	114016	1185.6	-5.23279	-6.94445
165.2	114043	1182.4	-5.49528	-7.0544
165.4	114071	1179.2	-5.55206	-6.79823
165.6	114098	1176.4	-5.19855	-6.87768
165.8	114126	1173.4	-5.47387	-6.91944
166	114154	1170.4	-5.34741	-7.07384
166.2	114181	1167.8	-5.82002	-7.19486
166.4	114208	1165.2
166.6	114236	1162.4	-5.90444	-7.16749
166.8	114263	1160	-6.19899	-6.69953
167	114291	1157.8	-5.67308	-6.93371
167.2	114318	1155.6	-5.4493	-7.11495
167.4	114346	1153.4	-5.42711	-7.15895
167.6	114373	1151.2	-5.25499	-7.03341
167.8	114401	1149	-5.27973	-6.88101
168	114428	1147	-5.32481	-6.98637
168.2	114455	1145.2	-5.13163	-6.82974
168.4	114483	1143.6	-5.2205	-6.8571
168.6	114510	1141.8	-5.0281	-6.97572
168.8	114537	1140.4	-5.225	-7.02749
169	114565	1138.8	-5.26413	-7.05422
169.2	114593	1137.4	-5.06221	-6.91098
169.4	114620	1135.8	-5.37172	-6.83754
169.6	114648	1134.8	-5.5383	-6.86384
169.8	114675	1133.6	-5.466	-7.03819
170	114702	1132.6	-5.44356	-7.13302
170.2	114730	1131.6	-5.97719	-7.37219
170.4	114758	1130.8	-5.82783	-7.34382
170.6	114785	1129.8	-5.54115	-7.34344
170.8	114813	1129	-5.36859	-7.2989
171	114840	1128.4	-4.6882	-7.16041
171.2	114868	1128	-4.53779	-7.15593
171.4	114895	1127.6	-4.21263	-7.14009
171.6	114922	1127.2	-4.35167	-7.00788
171.8	114950	1127	-4.39225	-7.09765
172	114977	1126.8	-4.12739	-7.16808
172.2	115004	1126.8	-4.22863	-7.13562
172.4	115032	1127.2	-4.32616	-7.23803
172.6	115060	1127.6	-4.3333	-7.17452
172.8	115087	1127.8
173	115115	1128.2	-3.90034	-7.0765
173.2	115142	1128.6	-4.4378	-6.91919
173.4	115169	1129	-4.10039	-6.85649
173.6	115197	1129.4	-4.29899	-6.83219
173.8	115224	1130.4	-4.48024	-6.71443
174	115251	1131.4	-4.76029	-6.93454
174.2	115279	1132.2	-4.94617	-7.24294
174.4	115306	1133.4	-5.37803	-7.38789
174.6	115334	1134.8	-5.39267	-7.24696
174.8	115361	1136	-5.73667	-7.318
175	115389	1137.4	-5.20467	-7.14449
175.2	115416	1138.8	-4.9061	-7.26288
175.4	115444	1140.4	-4.73038	-7.19393
175.6	115471	1141.8	-4.43385	-7.24771
175.8	115499	1143.6	-4.38954	-7.15453
176	115526	1145.4	-4.50827	-7.15775
176.2	115554	1147.2	-4.47589	-7.26853
176.4	115581	1149.2	-4.88407	-7.33742
176.6	115608	1151.6	-5.10562	-7.219
176.8	115636	1153.8	-5.28392	-7.27065
177	115662	1156.2	-5.61221	-7.03314
177.2	115701	1147.2	-5.63577	-6.99564
177.4	115740	1138.2	-5.64956	-6.92813
177.6	115778	1129.4	-5.52309	-7.00763
177.8	115817	1120.4	-5.60402	-6.95386
178	115856	1112.6	-6.15245	-7.17022
178.2	115894	1105.6	-6.39289	-7.16886
178.4	115932	1098.6	-6.69386	-6.90821
178.6	115971	1091.6	-6.66677	-7.02203
178.8	116009	1085	-6.36213	-7.42342
179	116047	1080.2	-6.06989	-7.22956
179.2	116085	1075.2	-6.11328	-7.26922
179.4	116124	1070.2	-6.15529	-7.32274
179.6	116162	1065.4	-6.292	-7.39984
179.8	116200	1062.4	-6.19267	-7.09632
180	116238	1059.6	-6.24095	-7.36834
180.2	116277	1056.8	-7.08826	-7.47015
180.4	116315	1054	-6.642	-6.94306
180.6	116354	1052.4	-6.15685	-6.78928
180.8	116392	1052	-5.84837	-6.93251
181	116430	1051.6	-5.39729	-7.18261
181.2	116469	1051.2	-5.35296	-7.27235
181.4	116507	1051	-5.48822	-7.42149
181.6	116546	1053	-5.37397	-7.47828
181.8	116584	1055	-5.5721	-7.49808
182	116622	1056.8	-5.66763	-7.28967
182.2	116661	1058.8	-5.56578	-7.17844
182.4	116699	1062.2	-6.13753	-7.07486
182.6	116737	1066.2	-6.68776	-7.12402
182.8	116776	1070	-6.73676	-6.97647
183	116814	1074	-7.10154	-7.0174
183.2	116852	1078.6	-7.15925	-6.8978
183.4	116890	1084.8	-6.9101	-6.62027
183.6	116929	1090.8	-7.04674	-6.55641
183.8	116967	1096.8	-7.27041	-6.83181
184	117006	1103	-7.17331	-6.82964
184.2	117033	1108.8	-7.48388	-6.90427
184.4	117061	1114.8	-7.10717	-6.94953
184.6	117089	1120.6	-6.90395	-6.6037
184.8	117117	1126.6	-6.88931	-6.7537
185	117145	1133.4	-6.91237	-6.7046
185.2	117172	1140.6	-6.24955	-6.94072
185.4	117200	1147.8	-6.46561	-7.1477
185.6	117228	1155	-6.99461	-7.44804
185.8	117255	1162.4	-6.63814	-7.61151
186	117283	1170.8	-6.62926	-7.15155
186.2	117311	1179	-6.80736	-7.05207
186.4	117338	1187.4	-6.88711	-7.20467
186.6	117366	1195.6	-6.44422	-6.6819
186.8	117394	1205	-6.64549	-6.76878
187	117421	1214.4	-6.60743	-6.54927
187.2	117449	1223.8	-6.94037	-6.54343
187.4	117477	1233.2	-7.12746	-6.64352
187.6	117504	1243	-7.18891	-6.93403
187.8	117532	1253.4	-7.22118	-6.82032
188	117560	1263.6	-7.18108	-6.92634
188.2	117588	1274	-7.38399	-7.06167
188.4	117616	1284.4	-7.02427	-7.00865
188.6	117644	1295.6	-6.75164	-6.82794
188.8	117671	1306.8	-7.2463	-6.89806
189	117699	1318	-7.24065	-6.7329
189.2	117727	1329.2	-6.85964	-6.76289
189.4	117754	1341
189.6	117782	1353	-7.18402	-6.79084
189.8	117810	1365	-7.30517	-7.11545
190	117837	1376.8	-7.16945	-7.35725
190.2	117865	1389	-7.12346	-7.20666
190.4	117892	1401.8	-7.74803	-7.56109
190.6	117920	1414.4	-7.75991	-7.55397
190.8	117948	1427	-7.70578	-7.40205
191	117976	1439.8	-7.44731	-7.3232
191.2	118276	1423.8
191.4	118577	1408
191.6	118877	1392
191.8	119178	1376
192	119478	1360.2
192.2	119549	1288
192.4	119619	1215.8
192.6	119689	1143.6	-8.01287	-7.34688
192.8	119759	1071.4	-8.08187	-7.26872
193	119830	999.2	-8.16829	-7.4795
193.2	119898	945.6	-8.00953	-7.37449
193.4	119968	892.2	-7.77546	-7.37244
193.6	120036	838.6	-8.11261	-7.02693
193.8	120106	785	-8.49284	-7.28124
194	120174	731.4	-8.2967	-7.25125
194.2	120188	730	-8.20585	-6.99989
194.4	120201	728.6	-8.06545	-7.07118
194.6	120215	727.2	-8.22617	-7.00857
194.8	120228	725.8	-8.28712	-6.96811
195	120242	724.4	-8.31778	-6.66818
195.2	120255	723.4	-8.4645	-6.94213
195.4	120269	722.2	-8.30922	-6.96134
195.6	120282	721.2	-8.09512	-6.81576
195.8	120296	720	-8.24578	-6.83966
196	120309	719.2	-8.38564	-6.91519
196.2	120322	718.2	-8.53756	-6.59734
196.4	120336	717.4	-8.67992	-6.63309
196.6	120349	716.6	-8.78629	-6.65019
196.8	120363	715.8	-8.53142	-6.54134
197	120376	715
197.2	120389	714.4	-8.33697	-6.83238
197.4	120402	713.8	-8.36366	-7.19872
197.6	120416	713.2	-8.37786	-7.29383
197.8	120429	712.6	-8.81366	-6.97694
198	120442	712.2	-8.97465	-7.10264
198.2	120456	711.8	-8.91817	-6.80632
198.4	120469	711.6	-8.97709	-6.84758
198.6	120483	711.2	-9.04162	-6.86361
198.8	120496	711	-9.20833	-6.94423
199	120510	710.8	-9.54434	-7.17389
199.2	120523	710.8	-9.4778	-7.0695
199.4	120536	710.6	-9.21199	-7.16075
199.6	120550	710.4	-9.45885	-7.32394
199.8	120563	710.6	-9.44089	-7.11353
200	120577	710.6	-9.60298	-6.47149
200.2	120590	710.8	-9.48648	-6.76352
200.4	120604	711	-9.61537	-7.05149
200.6	120617	711.2	-9.56285	-6.75611
200.8	120630	711.6	-9.1342	-6.82693
201	120644	712	-9.11117	-6.67904
201.2	120657	712.4	-9.08003	-6.39459
201.4	120671	712.8	-9.11815	-6.56561
201.6	120684	713.4	-9.23451	-6.79714
201.8	120697	714	-9.29935	-6.56884
202	120710	714.6	-9.32948	-6.79698
202.2	120724	715.2	-9.37545	-6.89158
202.4	120737	715.8	-9.26153	-6.57985
202.6	120750	716.6	-9.20741	-6.37944
202.8	120764	717.6	-9.30842	-6.94699
203	120777	718.4	-9.25516	-6.89183
203.2	120791	719.4	-9.308	-7.19203
203.4	120804	720.4	-9.273	-7.27536
203.6	120818	721.4	-9.49935	-7.28061
203.8	120831	722.6	-9.4267	-6.87474
204	120844	723.6	-9.37107	-6.61811
204.2	120858	724.8	-9.22857	-6.69653
204.4	120871	726	-9.42386	-6.68861
204.6	120885	727.4	-9.57529	-6.76817
204.8	120898	728.6	-9.62184	-7.00113
205	120912	730	-9.783	-6.80339
205.2	120925	731.4	-9.90861	-6.93268
205.4	120939	733	-10.002	-7.20984
205.6	120952	734.6	-9.95587	-7.337
205.8	120965	736.2	-9.93704	-7.56181
206	120979	737.8	-9.90018	-7.30063
206.2	120992	739.4	-9.93324	-7.218
206.4	121006	741.2	-9.8123	-6.9335
206.6	121019	743	-9.75583	-6.82993
206.8	121032	744.8	-9.62402	-6.83769
207	121045	746.6	-9.53074	-6.5752
207.2	121058	748.6	-9.63109	-6.57609
207.4	121072	750.6	-9.44454	-6.38079
207.6	121085	752.8	-9.47702	-6.35794
207.8	121099	754.8	-9.57544	-6.46655
208	121112	756.8	-9.39569	-6.71686
208.2	121125	759	-9.31192	-6.65473
208.4	121138	761.2	-9.59369	-6.87828
208.6	121150	763.4	-9.31604	-6.51986
208.8	121163	765.6	-9.38877	-6.61133
209	121176	767.8	-9.48492	-6.93305
209.2	121190	767.2	-9.34802	-6.93994
209.4	121205	766.6	-9.47933	-6.81343
209.6	121219	766.2	-9.38519	-6.54625
209.8	121234	765.6	-9.5113	-6.81518
210	121248	765.2	-9.48032	-6.95471
210.2	121262	764.8	-9.58043	-6.97147
210.4	121276	764.2	-9.7083	-7.06594
210.6	121290	763.8	-9.85032	-6.92052
210.8	121304	763.4	-9.73561	-6.85531
211	121318	763	-9.878	-6.8159
211.2	121332	762.8	-9.85195	-6.87281
211.4	121346	762.6	-10.0851	-6.93878
211.6	121360	762.4	-9.92974	-6.7929
211.8	121374	762.2	-9.838	-6.86763
212	121388	762	-9.63729	-6.73652
212.2	121401	762	-9.40379	-6.66814
212.4	121415	762	-9.35313	-6.76609
212.6	121429	762	-9.4265	-6.65368
212.8	121443	762	-9.64742	-7.11693
213	121456	762	-9.88661	-7.13352
213.2	121470	762.2	-10.1612	-7.41126
213.4	121484	762.4	-10.2994	-7.48205
213.6	121498	762.6	-10.149	-7.3895
213.8	121512	763	-10.2206	-7.4553
214	121526	763.2	-10.3534	-7.43354
214.2	121540	763.6	-10.2293	-7.37661
214.4	121554	764	-10.0779	-6.99294
214.6	121568	764.4	-10.0922	-7.11528
214.8	121582	764.8	-10.0219	-6.95708
215	121596	765.2	-9.73307	-6.87136
215.2	121609	765.8	-9.61517	-6.71172
215.4	121623	766.4	-9.80862	-6.87962
215.6	121637	767	-9.80919	-6.82735
215.8	121651	767.6	-9.90392	-7.02392
216	121664	768.2	-9.78255	-6.99163
216.2	121678	769	-9.56777	-7.10628
216.4	121692	769.8	-9.49262	-7.06979
216.6	121706	770.8	-9.63454	-6.95984
216.8	121720	771.6	-9.87308	-6.90627
217	121734	772.4	-9.97869	-6.90315
217.2	121748	773.2	-10.0103	-6.81144
217.4	121762	774.2	-9.97865	-6.89631
217.6	121776	775.2	-9.91275	-7.04489
217.8	121790	776	-9.95799	-7.17978
218	121804	777	-10.1104	-7.25191
218.2	121817	778.2	-9.99758	-7.30312
218.4	121831	779.4	-10.128	-7.40711
218.6	121845	780.6	-9.98133	-7.21739
218.8	121859	781.8	-9.97087	-7.19035
219	121872	783	-9.81486	-6.9917
219.2	121886	784.4	-9.72433	-7.09786
219.4	121900	785.6	-9.66576	-7.06596
219.6	121914	787	-9.73378	-7.15661
219.8	121928	788.4	-9.68676	-7.17287
220	121942	789.6	-9.74032	-7.22194
220.2	121955	791.2	-9.79949	-7.21241
220.4	121969	792.6	-9.74339	-7.2202
220.6	121983	794.2	-9.75708	-7.1018
220.8	121997	795.6	-9.75666	-7.07391
221	122010	797.2	-9.7286	-7.0477
221.2	122024	798.8	-9.77077	-7.07339
221.4	122038	800.6	-9.70401	-7.02655
221.6	122052	802.2	-9.63413	-7.0455
221.8	122066	804	-9.67624	-7.10714
222	122080	805.6	-9.64669	-7.00635
222.2	122094	807.6	-9.59796	-6.93482
222.4	122108	809.4	-9.74908	-7.18019
222.6	122122	811.4	-9.81632	-6.94812
222.8	122136	813.2	-9.82137	-7.08413
223	122150	815	-9.90642	-7.07931
223.2	122163	817	-9.89313	-6.95069
223.4	122177	819	-9.88299	-7.07503
223.6	122191	821	-9.97394	-7.02272
223.8	122205	822.8	-9.84783	-6.98438
224	122218	824.8	-9.8224	-7.10151
224.2	122232	826.8	-9.69718	-7.25988
224.4	122246	828.6	-9.66057	-7.20312
224.6	122260	830.4	-9.78415	-7.18278
224.8	122274	832.4	-9.96127	-7.09834
225	122288	834.2	-9.88861	-6.86777
225.2	122300	834.6	-10.0621	-6.92967
225.4	122313	835	-10.1577	-7.26856
225.6	122326	835.4	-9.98099	-7.12859
225.8	122339	835.6	-10.0333	-7.13688
226	122352	835.6	-10.0571	-7.07378
226.2	122364	835.6	-9.88818	-7.12351
226.4	122377	835.8	-9.80831	-6.90241
226.6	122390	835.8	-9.79145	-7.01059
226.8	122403	836	-9.78824	-7.36623
227	122415	836.2	-9.89364	-7.34008
227.2	122428	836.4	-9.76597	-7.50913
227.4	122440	836.6	-9.59517	-7.33024
227.6	122453	836.6	-9.52429	-7.36219
227.8	122466	836.6	-9.59101	-7.21203
228	122478	836.6	-9.67548	-7.46126
228.2	122491	836.8	-9.83892	-7.30248
228.4	122504	837.2	-9.84194	-7.16703
228.6	122517	837.4	-9.84078	-7.26089
228.8	122530	837.8	-9.80983	-7.14072
229	122542	837.8	-9.83787	-7.25797
229.2	122555	838	-9.94299	-7.40638
229.4	122568	838	-10.0237	-7.48449
229.6	122580	838.4	-9.74128	-7.42454
229.8	122593	838.6	-9.99742	-7.66738
230	122606	839	-9.90622	-7.53593
230.2	122618	839.2	-9.79234	-7.65933
230.4	122631	839.4	-9.82682	-7.60638
230.6	122644	839.4	-9.86829	-7.5884
230.8	122657	839.8	-9.83182	-7.31605
231	122670	840	-9.95867	-7.6647
231.2	122682	840.2	-9.92702	-7.55786
231.4	122695	840.6	-9.91483	-7.44849
231.6	122707	841	-9.95952	-7.41437
231.8	122720	841.6	-9.85147	-7.25311
232	122732	842	-9.77228	-7.18837
232.2	122745	842.4	-9.83449	-7.39115
232.4	122758	842.8	-9.84447	-7.38856
232.6	122771	843.2	-9.77045	-7.33615
232.8	122784	843.4	-9.78587	-7.46135
233	122796	843.6	-9.93114	-7.52282
233.2	122809	844	-9.92578	-7.42034
233.4	122822	844.4	-10.0789	-7.38087
233.6	122834	845	-10.0403	-7.35984
233.8	122847	845.4	-9.94238	-7.29845
234	122860	846.2	-10.1429	-7.45399
234.2	122872	846.8	-10.1346	-7.40351
234.4	122885	847.4	-10.1682	-7.16474
234.6	122898	847.6	-9.91844	-7.02797
234.8	122911	848	-9.98824	-7.3177
235	122924	848.4	-10.0816	-7.46355
235.2	122936	849	-9.92135	-7.2866
235.4	122949	849.4	-9.95784	-7.36271
235.6	122962	850	-10.0164	-7.26202
235.8	122974	850.6	-9.96291	-7.62655
236	122987	851.2	-9.93061	-7.66405
236.2	122999	852	-10.1284	-7.56498
236.4	123012	852.4	-10.1989	-7.30763
236.6	123025	853	-10.2189	-7.19529
236.8	123038	853.6	-10.2709	-7.05047
237	123050	854.2	-10.2235	-7.05777
237.2	123063	855	-10.3434	-7.08638
237.4	123076	855.8	-10.3909	-7.14595
237.6	123089	856.4	-10.3025	-6.99752
237.8	123102	857	-10.16	-7.11742
238	123114	857.4	-10.0041	-6.9547
238.2	123127	857.8	-9.94206	-6.89276
238.4	123140	858.6	-10.1373	-7.05284
238.6	123152	859.2	-10.0099	-6.98799
238.8	123165	859.8	-10.1347	-7.03255
239	123178	860.6	-10.098	-7.05304
239.2	123190	861.4	-10.2177	-7.20081
239.4	123203	862.2	-10.1838	-7.18257
239.6	123216	863.2	-10.2718	-7.35346
239.8	123229	864.2	-10.2562	-7.24839
240	123242	865.2	-10.3061	-7.15627
240.2	123254	865.6	-10.3134	-6.93417
240.4	123267	866.2	-10.2318	-7.15445
240.6	123280	866.6	-10.2179	-7.25191
240.8	123292	867.4	-10.3132	-7.32049
241	123305	868.2	-10.1848	-7.18136
241.2	123317	869.2	-10.2642	-7.27117
241.4	123330	870.2	-10.2897	-7.26105
241.6	123343	871.4	-10.3146	-7.18277
241.8	123356	872.6	-10.1183	-7.06225
242	123368	873.8	-10.1043	-6.94496
242.2	123381	874.6	-10.0991	-6.91569
242.4	123393	875.6	-10.1608	-6.97676
242.6	123406	876.4	-10.2806	-7.19797
242.8	123419	877	-10.1963	-7.07218
243	123432	877.8	-10.2328	-7.14703
243.2	123444	878.6	-10.3255	-7.29261
243.4	123457	879.8	-10.2254	-7.07002
243.6	123470	881.2	-10.2439	-6.88057
243.8	123483	882.4	-10.2073	-6.91362
244	123495	883.4	-10.126	-6.95492
244.2	123508	884.6	-10.2249	-7.07801
244.4	123520	885.6	-10.1902	-6.99171
244.6	123533	886.6	-10.2029	-6.98734
244.8	123546	887.6	-10.357	-7.31396
245	123558	888.6	-10.388	-7.41498
245.2	123571	889.6	-10.3797	-7.31436
245.4	123584	890.6	-10.3437	-7.30593
245.6	123597	891.6	-10.2568	-7.12361
245.8	123610	892.6	-10.1427	-7.12438
246	123622	893.4	-10.148	-7.01628
246.2	123635	894.2	-10.0992	-7.15098
246.4	123648	895.2	-10.1728	-7.05212
246.6	123661	896	-10.139	-7.1061
246.8	123674	896.8	-10.1437	-7.18296
247	123686	897.8	-10.0133	-7.15244
247.2	123699	898.8	-9.99657	-7.27985
247.4	123711	900	-10.0152	-7.33905
247.6	123724	901.2	-10.1617	-7.34956
247.8	123737	902.6	-10.1304	-7.52923
248	123750	904	-10.1189	-7.6959
248.2	123762	905.2	-10.1302	-7.45703
248.4	123775	906.2	-10.2111	-7.41384
248.6	123788	907.4	-10.2495	-7.31952
248.8	123801	908.4	-10.2432	-7.11979
249	123813	909.8	-10.1846	-7.25464
249.2	123826	911.2	-10.2297	-7.45498
249.4	123838	912.4	-10.3198	-7.29088
249.6	123851	913.4	-10.3695	-7.26185
249.8	123864	914.4	-10.4321	-7.25732
250	123876	915.4	-10.3751	-7.22916
250.2	123889	916.4	-10.405	-7.36034
250.4	123902	917.6	-10.4351	-7.39462
250.6	123915	918.6	-10.2799	-7.31357
250.8	123927	920	-10.4655	-7.38658
251	123940	921.4	-10.4552	-7.35314
251.2	123952	923	-10.4891	-7.27142
251.4	123965	924.2	-10.3941	-7.37556
251.6	123978	925.2	-10.3783	-7.18863
251.8	123991	926.2	-10.4517	-7.18452
252	124004	927.4	-10.4403	-7.17272
252.2	124016	928.8	-10.4868	-7.22187
252.4	124029	930	-10.464	-7.41172
252.6	124042	931.4	-10.5044	-7.43093
252.8	124054	932.6	-10.3804	-7.41489
253	124067	934	-10.4583	-7.4865
253.2	124079	935.4	-10.2997	-7.20116
253.4	124092	937	-10.3783	-7.14
253.6	124105	938.6	-10.4191	-7.22724
253.8	124118	940	-10.3793	-7.12411
254	124130	941.2	-10.3766	-7.12414
254.2	124143	942.6	-10.3791	-7.0613
254.4	124156	943.8	-10.4198	-7.16754
254.6	124169	945.2	-10.5348	-7.06581
254.8	124182	946.4	-10.5123	-7.09955
255	124194	947.6	-10.421	-7.01209
255.2	124207	949.2	-10.2871	-7.08151
255.4	124220	950.8	-10.2849	-7.06634
255.6	124232	952.4	-10.2781	-7.00821
255.8	124245	953.8	-10.3193	-6.98668
256	124258	955.2	-10.3542	-7.09118
256.2	124270	956.6	-10.2818	-7.18442
256.4	124283	958.2	-10.2941	-7.20143
256.6	124296	959.6	-10.1312	-7.15001
256.8	124309	961	-10.2199	-7.05493
257	124321	962.4	-10.3114	-7.06413
257.2	124334	964	-10.3257	-7.0362
257.4	124346	965.6	-10.471	-7.18675
257.6	124359	967.2	-10.3997	-7.17165
257.8	124372	968.6	-10.3576	-7.1212
258	124384	970	-10.2599	-7.06011
258.2	124397	971.6	-10.1621	-7.01096
258.4	124410	973.4	-10.0579	-7.13901
258.6	124423	975.2	-10.1397	-7.17437
258.8	124436	977	-10.1731	-7.27728
259	124448	978.6	-10.2151	-7.50836
259.2	124461	980	-10.3296	-7.27898
259.4	124473	981.6	-10.3276	-7.31378
259.6	124486	983	-10.2777	-7.52633
259.8	124499	984.4	-10.2387	-7.45786
260	124512	985.8	-10.3057	-7.47585
260.2	124524	987.4	-10.2648	-7.51382
260.4	124537	989.2	-10.2421	-7.46403
260.6	124550	990.8	-10.1567	-7.38454
260.8	124563	992.4	-10.1518	-7.41532
261	124576	994.2	-10.0041	-7.18886
261.2	124588	995.8	-10.0737	-7.41956
261.4	124601	997.4	-10.1193	-7.4605
261.6	124613	998.8	-10.0514	-7.47067
261.8	124626	1000.4	-9.89917	-7.44884
262	124638	1002	-10.0992	-7.57013
262.2	124651	1003.6	-10.0005	-7.51043
262.4	124664	1005.4	-9.93342	-7.53211
262.6	124677	1007	-9.95952	-7.57068
262.8	124690	1008.6	-10.0451	-7.63123
263	124702	1010.4	-9.9623	-7.53402
263.2	124715	1012	-10.2137	-7.54643
263.4	124728	1013.8	-10.1201	-7.55816
263.6	124740	1015.6	-10.1774	-7.52504
263.8	124753	1017.4	-10.156	-7.54513
264	124766	1019	-10.1747	-7.46065
264.2	124778	1020.6	-10.1518	-7.60505
264.4	124791	1022.4	-10.0341	-7.50259
264.6	124804	1024.4	-10.0606	-7.29853
264.8	124817	1026.4	-10.0992	-7.15521
265	124830	1028.4	-10.123	-7.0625
265.2	124841	1027.4	-10.2515	-7.67106
265.4	124852	1026.6	-10.2492	-7.71567
265.6	124863	1025.8	-10.1954	-7.72953
265.8	124874	1024.8	-10.2561	-7.62733
266	124885	1024	-10.1889	-7.57972
266.2	124896	1023.4	-10.2068	-7.68202
266.4	124908	1022.8	-10.222	-7.61446
266.6	124919	1022.4	-10.1318	-7.62336
266.8	124930	1021.8	-10.0705	-7.56759
267	124941	1021.2	-10.1747	-7.57641
267.2	124952	1020.6	-10.1345	-7.5797
267.4	124964	1020	-10.0906	-7.54633
267.6	124975	1019.4	-10.0292	-7.74051
267.8	124986	1018.8
268	124998	1018.4	-10.0789	-7.69723
268.2	125009	1017.8	-10.0438	-7.61914
268.4	125020	1017.2	-10.0738	-7.61558
268.6	125031	1016.8	-10.0042	-7.57415
268.8	125042	1016.2	-10.1997	-7.22206
269	125054	1015.8	-10.1998	-7.32596
269.2	125065	1015.2	-10.2106	-7.34526
269.4	125076	1014.8	-10.23	-7.25327
269.6	125087	1014.4	-10.1151	-7.28612
269.8	125098	1013.8	-10.2031	-7.372
270	125109	1013.4	-10.1671	-7.3722
270.2	125120	1013.2	-10.1224	-7.26823
270.4	125132	1012.8	-10.1531	-7.35652
270.6	125143	1012.4	-10.1212	-7.4868
270.8	125154	1012	-10.1637	-7.56139
271	125165	1011.6	-10.0644	-7.52668
271.2	125176	1011.4	-10.1936	-7.50267
271.4	125187	1011	-10.0557	-7.53781
271.6	125198	1010.8	-10.1793	-7.6397
271.8	125210	1010.4	-10.2537	-7.60207
272	125221	1010
272.2	125232	1009.8	-10.1055	-7.40518
272.4	125243	1009.4	-10.1809	-7.61786
272.6	125254	1009	-10.2922	-7.2813
272.8	125265	1008.8	-10.1042	-7.2076
273	125277	1008.6	-10.2133	-7.34548
273.2	125288	1008.2	-10.2977	-7.48702
273.4	125299	1008	-10.1745	-7.34449
273.6	125311	1007.8	-9.98757	-7.44276
273.8	125322	1007.6	-10.0929	-7.36148
274	125333	1007.2	-10.149	-7.3538
274.2	125344	1007	-10.0505	-7.29147
274.4	125356	1006.6	-10.1576	-7.31004
274.6	125367	1006.4	-10.2224	-7.31285
274.8	125378	1006	-10.1625	-7.30225
275	125389	1006	-10.188	-7.22263
275.2	125400	1005.8	-10.3793	-7.67173
275.4	125411	1005.8	-10.3793	-7.63961
275.6	125422	1005.6	-10.4337	-7.56893
275.8	125434	1005.6	-10.3834	-7.561
276	125445	1005.4	-10.3085	-7.53763
276.2	125456	1005.2	-10.2616	-7.62125
276.4	125467	1005.2	-10.2825	-7.52108
276.6	125478	1005	-10.3078	-7.65857
276.8	125489	1004.8	-10.3512	-7.71556
277	125500	1004.8	-10.386	-7.71305
277.2	125512	1004.6	-10.3876	-7.87388
277.4	125523	1004.4	-10.458	-7.90125
277.6	125534	1004.2	-10.3048	-7.81198
277.8	125545	1004.2	-10.3635	-7.86736
278	125557	1004.2	-10.3221	-7.74884
278.2	125568	1004	-10.3026	-7.48581
278.4	125579	1004	-10.3256	-7.44407
278.6	125591	1004	-10.1727	-7.26904
278.8	125602	1004	-10.1327	-7.20259
279	125613	1004	-10.1174	-7.15856
279.2	125624	1004	-10.1507	-7.22655
279.4	125635	1004	-10.2398	-7.27764
279.6	125646	1004	-10.2135	-7.19623
279.8	125658	1004.2	-10.1004	-7.26253
280	125669	1004.2	-10.2698	-7.55705
280.2	125680	1004.4	-10.122	-7.42308
280.4	125691	1004.4	-10.0668	-8.03083
280.6	125702	1004.6	-9.95238	-7.39397
280.8	125713	1004.6	-10.0257	-7.76627
281	125724	1004.8	-9.95496	-7.68469
281.2	125736	1005	-10.0084	-7.80175
281.4	125747	1005	-10.0108	-7.62253
281.6	125758	1005.2	-10.0722	-7.53229
281.8	125769	1005.4	-10.0926	-7.54776
282	125780	1005.6	-10.0341	-7.7352
282.2	125791	1005.8	-10.1407	-7.93522
282.4	125802	1006	-10.1811	-8.03475
282.6	125814	1006.2	-10.1815	-7.86574
282.8	125825	1006.4	-10.2118	-7.94778
283	125836	1006.4	-10.1642	-7.95669
283.2	125848	1006.6	-10.103	-7.66382
283.4	125859	1006.6	-10.0056	-7.3932
283.6	125870	1007	-10.0479	-7.46184
283.8	125882	1007.2	-10.0553	-7.30307
284	125893	1007.6	-10.0692	-7.33822
284.2	125904	1007.8	-10.0562	-7.42791
284.4	125915	1008.2	-10.0034	-7.30025
284.6	125926	1008.4	-10.0501	-7.29643
284.8	125937	1008.6	-10.0291	-7.25807
285	125948	1008.8	-10.0299	-7.32185
285.2	125960	1009.2	-10.0251	-7.37026
285.4	125971	1009.4	-10.0798	-7.25902
285.6	125982	1009.8	-10.0065	-7.29208
285.8	125993	1010	-10.0148	-7.50398
286	126004	1010.4	-9.87359	-7.30999
286.2	126015	1010.8	-9.88452	-7.38636
286.4	126026	1011.2	-9.8406	-7.38804
286.6	126038	1011.6	-9.89746	-7.23969
286.8	126049	1011.8	-9.8513	-7.11391
287	126060	1012.2	-9.88887	-7.16237
287.2	126071	1012.6	-9.98548	-7.48782
287.4	126082	1013	-9.92228	-7.11999
287.6	126093	1013.4	-9.8867	-7.24257
287.8	126104	1013.8	-10.0449	-7.33525
288	126116	1014.2	-10.043	-7.35177
288.2	126127	1014.6	-10.0098	-7.45305
288.4	126138	1015.2	-9.95883	-7.44525
288.6	126149	1015.6	-10.0033	-7.46783
288.8	126160	1016.2	-10.0053	-7.46205
289	126171	1016.6	-9.90731	-7.44994
289.2	126182	1017.2	-9.97766	-7.39494
289.4	126194	1017.6	-9.74059	-7.67338
289.6	126205	1018.2	-9.83518	-7.6225
289.8	126216	1018.8	-9.76093	-7.60073
290	126228	1019.2	-9.84337	-7.78052
290.2	126239	1019.8	-9.91979	-7.84818
290.4	126250	1020.4	-10.0704	-8.06812
290.6	126262	1021	-10.0487	-7.95045
290.8	126273	1021.6	-10.0431	-7.98079
291	126284	1022.2	-9.95391	-7.96809
291.2	126295	1022.8	-9.93271	-8.09614
291.4	126306	1023.4	-9.99201	-7.91857
291.6	126317	1024	-10.0002	-8.15383
291.8	126328	1024.6	-10.0297	-8.00455
292	126340	1025.2	-9.8733	-7.7676
292.2	126351	1025.8	-9.98047	-7.63691
292.4	126362	1026.6	-10.0949	-7.82138
292.6	126373	1027.2	-10.1345	-7.70511
292.8	126384	1027.8	-10.047	-7.74651
293	126395	1028.6	-10.1321	-7.77323
293.2	126406	1029.2	-10.1162	-7.72343
293.4	126418	1030	-10.1163	-7.59005
293.6	126429	1030.8	-10.1922	-7.62539
293.8	126441	1031.6	-10.2264	-7.6995
294	126452	1032.4	-10.2027	-7.72779
294.2	126463	1033	-10.2968	-7.56119
294.4	126474	1033.8	-10.3611	-7.57232
294.6	126486	1034.6	-10.2642	-7.3455
294.8	126497	1035.2	-10.2424	-7.42193
295	126508	1036	-10.1603	-7.20095
295.2	126519	1036.8	-10.1307	-7.60646
295.4	126530	1037.6	-10.1026	-7.52806
295.6	126541	1038.6	-10.0705	-7.44487
295.8	126552	1039.4	-10.0125	-7.54289
296	126564	1040.2	-10.0286	-7.68941
296.2	126574	1039.2	-10.07	-7.65651
296.4	126584	1038	-9.98506	-7.55494
296.6	126595	1037	-9.9324	-7.39898
296.8	126605	1036	-9.89938	-7.46375
297	126615	1035	-9.85204	-7.4686
297.2	126626	1034.2	-9.99236	-7.38895
297.4	126636	1033.2	-9.95193	-7.51856
297.6	126646	1032.2	-10.0246	-7.4794
297.8	126657	1031.2	-10.0765	-7.28508
298	126667	1030.2	-10.0627	-7.32984
298.2	126677	1029.2	-10.1147	-7.29427
298.4	126688	1028.4	-10.0399	-7.2998
298.6	126698	1027.6	-10.0619	-7.17039
298.8	126708	1026.6	-10.0297	-7.25804
299	126719	1025.8	-9.83904	-7.48394
299.2	126729	1024.8	-10.0299	-7.5551
299.4	126740	1024	-10.1393	-7.59884
299.6	126750	1023	-10.1214	-7.61991
299.8	126760	1022.2	-10.3357	-7.7624
300	126770	1021.2	-10.1896	-7.7429
300.2	126781	1020.4	-10.143	-7.73096
300.4	126791	1019.6	-9.87202	-7.17077
300.6	126802	1018.8	-9.85996	-7.39147
300.8	126812	1018	-9.85783	-7.85682
301	126822	1017.2	-9.85734	-7.99076
301.2	126833	1016.4	-9.96083	-8.00309
301.4	126843	1015.6	-9.91528	-7.44916
301.6	126854	1014.8	-9.94897	-7.5383
301.8	126864	1014	-9.94823	-7.60487
302	126875	1013.2	-9.97823	-7.84715
302.2	126885	1012.4	-9.94565	-7.84389
302.4	126895	1011.6	-9.98423	-7.67887
302.6	126905	1011	-9.92771	-7.68804
302.8	126916	1010.2	-9.88437	-7.49935
303	126926	1009.4	-9.95504	-7.68907
303.2	126937	1008.6	-9.84629	-7.60995
303.4	126947	1008	-9.93572	-7.83513
303.6	126957	1007.2	-9.87578	-7.74321
303.8	126967	1006.4	-9.72565	-7.54603
304	126978	1005.8	-9.74336	-7.58272
304.2	126988	1005.2	-9.72412	-7.71275
304.4	126999	1004.4	-9.94064	-7.80551
304.6	127009	1003.8	-9.81702	-7.98049
304.8	127019	1003.2	-9.92608	-8.05668
305	127029	1002.4	-9.96558	-8.03989
305.2	127040	1001.8	-9.92219	-8.10958
305.4	127050	1001.2	-9.84738	-7.83387
305.6	127061	1000.4	-9.85513	-7.67884
305.8	127071	999.8	-9.86183	-7.56364
306	127081	999.2	-9.78369	-7.39815
306.2	127091	998.6	-9.73079	-7.55555
306.4	127102	998	-9.82684	-7.57614
306.6	127112	997.6	-9.76776	-7.67445
306.8	127123	997	-9.78452	-7.73194
307	127133	996.6	-9.73931	-7.69248
307.2	127144	995.8	-9.63759	-7.6422
307.4	127154	995.2	-9.76932	-7.64588
307.6	127165	994.6	-9.69611	-7.63561
307.8	127175	994	-9.81204	-7.90257
308	127185	993.6	-9.81994	-7.83458
308.2	127195	993	-9.80409	-8.13432
308.4	127206	992.6	-9.89585	-7.9674
308.6	127216	992	-9.88061	-7.93611
308.8	127227	991.6	-9.76961	-7.7168
309	127237	991.2	-9.62804	-7.74422
309.2	127247	990.8	-9.65217	-7.74531
309.4	127257	990.2	-9.56723	-7.82609
309.6	127268	989.8	-9.52045	-7.63084
309.8	127278	989.4	-9.61655	-7.78548
310	127289	988.8	-9.56132	-7.78043
310.2	127299	988.6	-9.5225	-7.81334
310.4	127309	988.2	-9.57978	-7.70202
310.6	127319	987.8	-9.61727	-7.87486
310.8	127330	987.4	-9.5463	-7.74322
311	127340	987	-9.52848	-8.05325
311.2	127351	986.4	-9.56985	-7.63294
311.4	127361	986.2	-9.66466	-7.60575
311.6	127372	985.8	-9.63777	-7.62461
311.8	127382	985.4	-9.72706	-7.75949
312	127392	985.2	-9.90751	-7.97373
312.2	127403	984.8	-9.90343	-7.92737
312.4	127413	984.6	-9.84384	-8.01249
312.6	127423	984.2	-9.82981	-8.02561
312.8	127434	984	-9.55135	-8.24939
313	127444	983.6	-9.56985	-7.9206
313.2	127454	983.4	-9.69201	-8.17661
313.4	127465	983	-9.53114	-8.15798
313.6	127475	982.8	-9.47841	-8.02093
313.8	127485	982.6	-9.56677	-7.92216
314	127496	982.4	-9.56672	-7.97843
314.2	127506	982.2	-9.52155	-7.9791
314.4	127516	982	-9.493	-7.74386
314.6	127527	981.6	-9.56509	-7.96801
314.8	127537	981.4	-9.65703	-8.08718
315	127547	981.2	-9.57549	-8.04343
315.2	127558	981	-9.63882	-8.22002
315.4	127568	981	-9.58951	-8.28549
315.6	127579	980.8	-9.65096	-8.23292
315.8	127589	980.6	-9.44993	-8.02899
316	127600	980.4	-9.5386	-8.0022
316.2	127610	980.2	-9.39169	-8.08636
316.4	127620	980.2	-9.43008	-8.02694
316.6	127630	980	-9.36374	-8.14549
316.8	127641	980	-9.42394	-8.00968
317	127651	979.8	-9.56595	-8.05518
317.2	127662	979.8	-9.56128	-7.93311
317.4	127672	979.6	-9.73	-7.97661
317.6	127682	979.6	-9.74152	-8.05399
317.8	127692	979.4	-9.78823	-8.02682
318	127703	979.4	-9.76312	-7.99074
318.2	127713	979.4	-9.77552	-8.0454
318.4	127724	979.2	-9.74427	-7.98035
318.6	127734	979.2	-9.6154	-7.8725
318.8	127745	979.2	-9.6065	-7.75208
319	127755	979.2	-9.53054	-7.59659
319.2	127766	979	-9.56793	-7.65465
319.4	127776	979	-9.50543	-7.69654
319.6	127786	979	-9.37276	-7.53504
319.8	127796	979	-9.46019	-7.6016
320	127807	979	-9.36473	-7.62319
320.2	127817	979.2	-9.50004	-7.66686
320.4	127828	979.2	-9.50827	-7.73044
320.6	127838	979.2	-9.50285	-7.90165
320.8	127848	979.4	-9.51937	-7.67919
321	127858	979.4
321.2	127869	979.4	-9.44532	-7.62233
321.4	127879	979.6	-9.54657	-7.66021
321.6	127890	979.6	-9.48366	-7.66255
321.8	127900	979.6	-9.48544	-7.68075
322	127910	979.8	-9.58433	-7.80287
322.2	127920	979.8	-9.53179	-7.80763
322.4	127931	980	-9.48123	-7.82797
322.6	127941	980.2	-9.52883	-7.76017
322.8	127952	980.4	-9.48996	-8.08649
323	127962	980.4	-9.50046	-8.12525
323.2	127972	980.6	-9.52922	-8.25795
323.4	127982	980.8	-9.59168	-8.31893
323.6	127993	981	-9.50922	-8.30112
323.8	128003	981.2	-9.52409	-8.29247
324	128014	981.4	-9.45949	-8.32867
324.2	128024	981.6	-9.47322	-8.25553
324.4	128034	981.8	-9.49854	-8.2717
324.6	128044	982	-9.52059	-8.14067
324.8	128055	982.4	-9.42347	-8.08764
325	128065	982.6	-9.46301	-8.08522
325.2	128076	983	-9.23574	-7.86637
325.4	128086	983.2	-9.38245	-7.97124
325.6	128097	983.4	-9.32411	-7.7323
325.8	128107	983.8	-9.38844	-7.87996
326	128118	984.2	-9.28931	-7.97684
326.2	128128	984.6	-9.45166	-8.21002
326.4	128138	985	-9.4441	-8.30397
326.6	128148	985.4	-9.47444	-8.21892
326.8	128159	985.6	-9.29662	-8.01057
327	128169	986	-9.21184	-7.66497
327.2	128180	986.2	-9.39387	-7.90957
327.4	128190	986.6	-9.34596	-7.49263
327.6	128200	987	-9.42962	-7.53421
327.8	128210	987.2	-9.50658	-7.6152
328	128221	987.8	-9.44784	-7.35057
328.2	128231	988.2	-9.46613	-7.56473
328.4	128242	988.6	-9.34498	-7.83707
328.6	128252	989	-9.53053	-7.87576
328.8	128262	989.4
329	128272	990	-9.45327	-7.80221
329.2	128283	990.4	-9.42017	-7.60687
329.4	128293	990.8	-9.40566	-7.67368
329.6	128304	991.2	-9.41946	-7.70107
329.8	128314	991.6	-9.34886	-7.514
330	128324	992.2	-9.27306	-7.5652
330.2	128334	992.6	-9.25921	-7.62369
330.4	128345	993.2
330.6	128356	993.6	-9.26878	-7.83195
330.8	128366	994.2	-9.22599	-8.16065
331	128376	994.6	-9.1967	-7.85746
331.2	128387	995.2	-9.19711	-7.99554
331.4	128397	995.8	-9.14727	-8.10508
331.6	128408	996.4	-9.33682	-8.27082
331.8	128418	996.8	-9.36658	-7.99798
332	128428	997.4	-9.47533	-8.08235
332.2	128438	998	-9.41781	-7.95547
332.4	128449	998.6	-9.42484	-8.00297
332.6	128459	999.2	-9.52995	-8.12278
332.8	128470	999.8	-9.3363	-8.05672
333	128480	1000.4	-9.39094	-8.16992
333.2	128490	1001	-9.43291	-8.15957
333.4	128500	1001.6	-9.46682	-8.23006
333.6	128511	1002.2	-9.38594	-8.16745
333.8	128522	1002.8	-9.46934	-8.21074
334	128532	1003.6	-9.51785	-8.31184
334.2	128542	1004.2	-9.4942	-8.21643
334.4	128552	1005	-9.60782	-8.37131
334.6	128562	1005.6	-9.63539	-8.39545
334.8	128573	1006.4	-9.55369	-8.50639
335	128584	1007.2	-9.58811	-8.53831
335.2	128593	1006.6	-9.47359	-8.24404
335.4	128603	1006	-9.47367	-8.22954
335.6	128613	1005.2	-9.43059	-8.35086
335.8	128623	1004.6	-9.54923	-8.14231
336	128633	1004.2	-9.43249	-7.89242
336.2	128643	1003.8	-9.46111	-7.78266
336.4	128653	1003.2	-9.48837	-7.93379
336.6	128663	1002.8	-9.51041	-7.96693
336.8	128673	1002.4	-9.65465	-8.13876
337	128683	1002	-9.4872	-7.83498
337.2	128693	1001.6	-9.54451	-8.03211
337.4	128703	1001.4	-9.50085	-8.00052
337.6	128713	1001	-9.51689	-8.01351
337.8	128723	1000.8	-9.47462	-7.82381
338	128734	1000.6	-9.62773	-8.00327
338.2	128743	1000.4	-9.46292	-7.98593
338.4	128753	1000.2	-9.59332	-7.98858
338.6	128763	1000	-9.4279	-7.91034
338.8	128773	999.8	-9.56876	-7.67943
339	128783	999.6	-9.5797	-7.49632
339.2	128793	999.4	-9.54826	-7.52593
339.4	128803	999.4	-9.54142	-7.50286
339.6	128813	999.4	-9.61767	-7.71338
339.8	128823	999.4	-9.57834	-7.80459
340	128833	999.4	-9.41005	-7.77859
340.2	128843	999.4	-9.3785	-7.77651
340.4	128853	999.4	-9.35786	-7.6874
340.6	128863	999.6	-9.40611	-7.74019
340.8	128873	999.6	-9.47479	-7.66661
341	128882	999.6	-9.47807	-7.68489
341.2	128893	999.8	-9.41951	-7.77441
341.4	128903	1000	-9.48048	-7.98238
341.6	128913	1000	-9.41822	-8.02721
341.8	128923	1000.2	-9.33493	-7.83399
342	128933	1000.6	-9.39266	-7.67199
342.2	128943	1000.8	-9.37889	-7.60326
342.4	128953	1001	-9.58617	-7.74846
342.6	128962	1001.4	-9.53141	-7.88915
342.8	128972	1001.8	-9.56745	-7.89966
343	128982	1002	-9.56101	-7.97715
343.2	128992	1002.4	-9.35138	-8.01839
343.4	129002	1002.8	-9.38847	-8.01879
343.6	129012	1003.2	-9.38832	-7.99119
343.8	129022	1003.6	-9.22929	-8.00469
344	129032	1004	-9.1596	-8.0902
344.2	129042	1004.6	-9.30497	-8.0453
344.4	129052	1005	-9.18739	-7.97383
344.6	129062	1005.6	-9.11917	-8.06251
344.8	129072	1006	-9.03266	-8.09046
345	129082	1006.8	-9.12476	-7.83681
345.2	129092	1007.4	-9.07734	-7.745
345.4	129102	1008	-9.17344	-7.73986
345.6	129112	1008.6	-9.20396	-7.78702
345.8	129122	1009.2	-9.12138	-7.75342
346	129132	1010	-9.10347	-7.85488
346.2	129142	1010.6	-8.91207	-7.76511
346.4	129152	1011.4	-9.02198	-7.80844
346.6	129162	1012.2	-9.01727	-7.68649
346.8	129172	1013.2	-9.05498	-7.75318
347	129182	1014	-9.0671	-7.74877
347.2	129195	1016.4	-9.22993	-7.91817
347.4	129209	1018.8	-9.19413	-7.70731
347.6	129223	1021.2	-9.20664	-7.72299
347.8	129237	1023.4	-9.21168	-7.58385
348	129251	1026	-9.03274	-7.41866
348.2	129265	1028.8	-9.00829	-7.59812
348.4	129279	1031.6	-8.96306	-7.54145
348.6	129293	1034.4	-8.96578	-7.60675
348.8	129307	1037	-8.84686	-7.80396
349	129321	1040	-8.87026	-7.80724
349.2	129335	1042.8	-8.86638	-7.94773
349.4	129349	1045.8	-8.98483	-7.74625
349.6	129363	1048.6	-8.99181	-7.70078
349.8	129377	1051.8	-9.09039	-7.46726
350	129391	1055	-9.06274	-7.54554
350.2	129405	1058	-9.13048	-7.52898
350.4	129418	1061.2	-9.20452	-7.43408
350.6	129432	1064.4	-9.20728	-7.49946
350.8	129446	1067.8	-9.22519	-7.49272
351	129460	1071	-9.13931	-7.43878
351.2	129474	1074.4	-9.1565	-7.47413
351.4	129488	1077.6	-9.23285	-7.67921
351.6	129502	1081.2	-9.27225	-7.80249
351.8	129516	1084.8	-9.19633	-7.75479
352	129530	1088.4	-9.15936	-7.66477
352.2	129544	1092	-9.19002	-7.73585
352.4	129558	1095.6	-9.29259	-7.82996
352.6	129572	1099.2	-9.24371	-7.89383
352.8	129586	1103	-9.32271	-8.03491
353	129600	1106.6
353.2	129614	1110.4	-9.35257	-8.43341
353.4	129628	1114.4	-9.41345	-8.10149
353.6	129642	1118.2	-9.28104	-7.99372
353.8	129656	1122.2	-9.18936	-7.98538
354	129670	1126	-9.19981	-7.85436
354.2	129683	1130.2	-8.92514	-7.87372
354.4	129697	1134.2	-9.07678	-8.20758
354.6	129711	1138.2	-9.08386	-8.40256
354.8	129725	1142.4	-9.09539	-8.74423
355	129739	1146.6	-9.05098	-8.8988
355.2	129753	1150.8	-8.98484	-9.03862
355.4	129766	1155.2
355.6	129780	1159.6
355.8	129794	1163.8
356	129808	1168.2
356.2	129822	1172.4

## Sheet: OBI98
z (distance from top in mm)	Modelled age (year BP)	± 2σ (year BP)	δ13C	δ18O
0	119500	1018.8	-8.6255	-6.73166
2	119539	955.2	-9.49656	-6.54346
4	119581	893.2
6	119621	830.4	-9.1081	-6.73581
8	119659	806.4	-9.28038	-6.73019
10	119698	735.4	-9.39128	-7.47434
12	119782	772.6	-9.44661	-6.9645
14	119908	969	-9.38439	-7.20266
16	120033	1107.4	-9.39506	-7.02584
18	120162	1220.6	-9.30795	-7.62613
20	120291	1289.8	-9.53661	-6.88384
22	120422	1344.6	-9.5642	-7.27456
24	120544	1366	-9.46519	-7.0468
26	120667	1375.8	-9.58124	-6.9343
28	120797	1349.8	-9.2222	-7.90303
30	120924	1307.4	-9.39258	-7.73336
32	121049	1248.6	-9.2559	-7.67081
34	121172	1158.4	-9.37958	-7.94026
36	121297	1040.8	-9.12498	-7.30122
38	121424	866.4	-9.15551	-7.6558
40	121552	633.4	-9.07952	-7.65591
42	121603	675	-9.0805	-7.73613
44	121655	717.4	-9.37511	-7.71673
46	121707	758.6	-9.21284	-7.75921
48	121759	787.2	-8.9264	-7.72434
50	121810	813.2	-9.12012	-7.99552
52	121861	838	-9.34497	-8.10106
54	121913	854	-9.14202	-7.94765
56	121965	866.8	-9.30299	-7.88244
58	122016	876.8	-9.19171	-7.65439
60	122068	883.2	-9.11451	-7.73112
62	122120	888.4	-9.03601	-7.59193
64	122171	888.6	-9.18744	-7.96995
66	122224	884.6	-9.17813	-8.15041
68	122278	875.8	-9.37822	-7.81063
70	122328	862.6	-9.46509	-7.24545
72	122379	847	-8.95632	-7.94713
74	122430	827.6	-9.14809	-8.07599
76	122481	804.6	-9.38609	-8.27604
78	122531	778.8	-9.20716	-7.4095
80	122582	742.6	-9.18988	-7.57126
82	122634	702.2	-9.10651	-7.60737
84	122686	658.8	-9.1616	-8.26591
86	122738	599.4	-9.1582	-7.07775
88	122790	534.6	-9.36263	-7.45862
90	122842	463.4	-9.41218	-8.13471
92	122868	458.8	-9.32237	-7.69637
94	122895	454.8	-9.34244	-7.92125
96	122921	450.8	-9.23816	-7.88894
98	122948	443.8	-9.51411	-7.78349
100	122976	435.6	-9.50735	-7.43288
102	123002	426	-9.50086	-7.79605
104	123029	431	-9.45627	-7.93048
106	123055	450.8	-9.51276	-8.13021
108	123083	468.8	-9.44377	-8.18754
110	123109	487	-9.46848	-7.69977
112	123137	500.4	-9.28461	-7.3275
114	123163	514	-9.42676	-7.38708
116	123190	525.6	-9.10028	-7.87099
118	123217	536.8	-9.14602	-7.5954
120	123243	543.8	-9.38152	-7.783
122	123270	550.8	-9.13457	-7.69772
124	123297	557.6	-9.29247	-8.04734
126	123323	562.6	-9.31708	-7.79424
128	123350	567	-9.40101	-7.67781
130	123377	569.8	-9.58221	-8.19657
132	123404	574	-9.40212	-8.11211
134	123431	571.6	-9.4085	-7.85081
136	123458	570.4	-9.4786	-7.71434
138	123484	568	-9.50838	-8.07607
140	123510	565	-9.53333	-7.56097
142	123538	559.8	-9.53626	-7.74195
144	123564	554.4	-9.65388	-7.93194
146	123591	549.2	-9.3261	-7.8268
148	123617	540	-9.63361	-7.54448
150	123645	530.4	-9.60009	-7.36746
152	123672	518.8	-9.58068	-7.96046
154	123699	507.8	-9.31682	-7.53784
156	123725	492.8	-9.45866	-7.48341
158	123752	478	-9.50599	-7.38019
160	123778	461.2	-9.37816	-7.50235
162	123799	454.2	-9.19484	-7.6872
164	123812	455	-9.53747	-8.0809
166	123824	456	-9.19483	-8.17721
168	123838	456.2	-9.07931	-7.80515
170	123850	456.8	-9.63064	-7.43757
172	123862	457.4	-9.40746	-8.38477
174	123876	457.4	-9.85805	-8.28693
176	123888	457.4	-9.14733	-8.06088
178	123901	457.2	-9.49434	-8.01763
180	123915	457.2	-9.1115	-7.87028
182	123928	457.6	-9.31009	-8.21539
184	123940	456.6	-9.44027	-7.49793
186	123954	455.6	-9.2514	-8.4176
188	123966	454.8	-9.34447	-7.44805
190	123979	453.8	-9.523	-7.72237
192	123992	453.4	-9.38651	-7.2693
194	124005	451.4	-9.38438	-7.79576
196	124018	450	-9.62827	-7.83045
198	124031	448.6	-9.68058	-7.64562
200	124044	447	-9.60435	-7.83918
202	124057	445.6	-9.76737	-7.76157
204	124070	443	-9.89421	-7.60149
206	124082	440.4	-9.79157	-7.64054
208	124095	438.2	-9.6443	-7.75599
210	124109	435.4	-9.83188	-7.59252
212	124121	432.8	-9.88552	-7.73222
214	124134	429.8	-9.43466	-7.95126
216	124148	426.4	-9.48697	-8.27286
218	124160	423.6	-10.0718	-8.13954
220	124174	419.4	-9.95504	-7.77419
222	124186	416.2	-9.6132	-7.64798
224	124199	412.6	-9.33769	-8.27843
226	124212	408.2	-9.88779	-8.16685
228	124225	403.8	-9.70211	-8.05658
230	124238	399.2	-10.1526	-7.94308
232	124250	394.4	-10.1774	-7.81634
234	124264	390	-9.89758	-8.32003
236	124276	384.6	-10.1313	-8.0563
238	124288	379.2	-9.80744	-7.77322
240	124302	373.4	-9.83265	-7.67409
242	124315	367.6	-9.59943	-7.87018
244	124326	363.8	-9.75255	-8.37085
246	124335	362.8	-9.80802	-8.3331
248	124342	363.2	-9.19429	-7.60491
250	124349	363.8	-9.32113	-7.42229
252	124356	364.4	-9.4799	-8.13123
254	124363	365.2	-9.80536	-8.1497
256	124369	365.4	-9.43742	-8.77927
258	124376	366	-10.008	-8.22605
260	124382	366.6	-9.41287	-7.9599
262	124390	367	-9.46703	-8.22947
264	124397	367.6	-9.36775	-8.36981
266	124404	368	-9.29783	-7.77204
268	124410	368.4	-9.39087	-7.91893
270	124418	369	-9.2022	-7.6704
272	124424	369.2	-9.4821	-8.25387
274	124431	369.8	-9.37042	-8.1613
276	124438	370	-9.23139	-7.94969
278	124445	370.4	-9.65348	-7.69733
280	124452	371	-9.46737	-8.03112
282	124458	371	-9.26302	-8.11493
284	124465	371.4	-9.5123	-7.84114
286	124483	383.8	-9.30038	-8.48141
288	124511	409.8	-9.37006	-8.24609
290	124539	434.8	-8.94207	-7.93436
292	124567	454.8	-9.32305	-8.8212
294	124596	473.8	-9.39197	-8.30446
296	124623	492.2	-9.42571	-8.27713
298	124652	504.8	-9.29848	-8.14086
300	124679	517.8	-9.83467	-8.31948
302	124707	529.4	-9.3007	-7.73282
304	124735	539.6	-9.21641	-8.01301
306	124763	549.2	-9.31739	-8.54605
308	124792	554.4	-8.95293	-8.13112
310	124820	559	-9.38115	-8.31221
312	124848	564.2	-9.67256	-7.71249
314	124876	565.2	-9.36996	-7.87216
316	124904	567	-8.97928	-8.02821
318	124931	567.2	-9.07005	-8.28534
320	124958	565.4	-9.0615	-8.50225
322	124986	562.4	-8.94109	-8.07112
324	125015	558.6	-8.59264	-7.4323
326	125044	553.6	-9.28204	-8.49572
328	125072	550.6	-8.68961	-7.93493
330	125400	1090.2	-9.0219	-7.93184
332	125765	1244.8	-8.74962	-8.27507
334	126117	1072.2	-9.10392	-8.2439
336	126314	904.4	-8.66286	-8.19735
338	126354	964.8	-8.6982	-7.74463
340	126394	1026.2	-8.77355	-7.83857

## Sheet: OBI99
z (distance from top in mm)	Modelled age (year BP)	± 2σ (year BP)	δ13C	δ18O
0	120100	1765.2	-9.79128	-7.54087
2	120157	1694.6	-9.37743	-7.53864
4	120215	1623.8	-9.38466	-7.37929
6	120273	1553.4	-9.2624	-7.39782
8	120330	1484.4	-9.2752	-7.17231
10	120388	1415.4	-9.44977	-7.51941
12	120446	1327	-9.48707	-7.48419
14	120505	1219	-9.18299	-7.25467
16	120564	1111	-9.38958	-7.39549
18	120624	928.2	-9.01144	-7.47063
20	120685	720.6	-9.40034	-7.70405
22	120746	512.8	-9.31179	-7.90687
24	120815	605.4	-9.38055	-7.77458
26	120884	698.2	-9.69543	-7.87663
28	120954	790.8	-9.00113	-7.54131
30	121023	859	-9.50761	-7.91429
32	121092	912.6	-9.5383	-7.7934
34	121162	966	-9.85876	-7.46485
36	121231	1012.8	-9.531	-7.73028
38	121300	1038.6	-9.66496	-7.89086
40	121369	1064.6	-9.50654	-7.97299
42	121438	1090.6	-9.04753	-7.9979
44	121507	1105.4	-9.6462	-8.06298
46	121576	1118.6	-9.37191	-7.64498
48	121646	1131.8	-9.54088	-7.38799
50	121715	1131.8	-9.07663	-7.54853
52	121784	1118.2	-9.11148	-7.9747
54	121853	1104.6	-9.14676	-7.95179
56	121922	1089.6	-9.33829	-7.94682
58	121992	1063.4	-9.63913	-7.55535
60	122061	1037	-9.29085	-7.93903
62	122130	1010.8	-9.11952	-7.52375
64	122199	964	-9.60754	-7.71435
66	122268	910.4	-9.085	-7.69219
68	122336	856.6	-9.18739	-8.29784
70	122406	787.4	-9.24616	-7.58535
72	122475	692.2	-9.41857	-7.37402
74	122544	597	-9.42848	-7.7223
76	122614	502	-9.40688	-7.77325
78	122645	515.4	-9.49106	-8.06837
80	122677	529	-9.75369	-7.85634
82	122708	541.8	-9.54807	-7.99466
84	122740	553.2	-9.76879	-7.89602
86	122771	564.6	-9.83163	-8.028
88	122802	572.2	-9.46085	-7.78574
90	122834	578.4	-9.54304	-8.0338
92	122866	584.4	-9.87484	-7.83928
94	122897	588.8	-10.027	-8.34081
96	122929	593.4	-9.6185	-7.92134
98	122960	594.2	-9.57898	-7.36016
100	122991	591.2	-9.83659	-7.8373
102	123023	588.4	-9.33586	-7.58655
104	123054	584	-9.24056	-7.63048
106	123086	579.6	-9.68189	-7.87502
108	123117	573.8	-9.61005	-7.54043
110	123148	564.4	-9.6372	-7.81852
112	123180	555	-9.34979	-7.54704
114	123211	544.4	-9.55212	-7.88321
116	123242	533	-9.41964	-8.05518
118	123274	521.6	-9.37283	-7.68363
120	123304	540.8	-9.67064	-7.62327
122	123335	560	-9.62849	-8.25716
124	123366	579.4	-9.04693	-7.81677
126	123396	598.6	-9.53783	-7.69221
128	123427	616.4	-9.57057	-7.69377
130	123458	630.2	-9.72689	-7.84099
132	123489	644	-9.37968	-7.5464
134	123520	657.6	-10.0247	-8.06528
136	123551	671.4	-9.40954	-7.52118
138	123582	681.8	-9.22558	-7.85002
140	123613	688.6	-9.33157	-8.2027
142	123643	695.4	-9.2688	-7.88244
144	123674	702.4	-9.14157	-8.18961
146	123705	709.2	-9.13137	-7.94681
148	123735	713.8	-9.2459	-8.05012
150	123766	717.6	-9.17078	-7.88743
152	123796	721.4	-9.40037	-7.89455
154	123827	725.2	-9.55894	-7.86084
156	123858	729	-9.27939	-8.16253
158	123888	725.8	-9.81594	-7.30272
160	123919	722.6	-9.19528	-8.17499
162	123950	719.4	-9.38684	-7.9778
164	123980	716.2	-9.45413	-7.50769
166	124011	712.2	-9.71597	-7.89443
168	124042	706	-9.42534	-7.783
170	124073	700	-9.79621	-7.59067
172	124103	693.8	-9.61898	-7.86918
174	124134	687.6	-9.9473	-7.86667
176	124165	678	-9.8567	-8.15911
178	124196	665	-9.99107	-8.04724
180	124227	652	-9.62153	-8.41434
182	124258	639	-9.53319	-7.58564
184	124289	626	-9.57781	-7.55377
186	124320	609.2	-9.57452	-7.38581
188	124350	591	-9.61403	-7.31801
190	124381	573	-9.65651	-7.39377
192	124412	554.8	-9.65387	-7.65961
194	124442	536.6	-9.57475	-7.6121
196	124479	560	-9.77995	-7.69488
198	124516	583.4	-9.75529	-7.97053
200	124553	606.8	-9.83101	-8.01519
202	124590	627	-9.81538	-8.09704
204	124627	644.2	-9.6036	-7.71789
206	124664	661.2	-9.43762	-7.76289
208	124700	678.2	-9.33676	-7.8843
210	124737	686.4	-9.46429	-8.05055
212	124774	694.6	-9.43437	-7.85322
214	124811	702.8	-9.23435	-7.48582
216	124848	709.2	-9.23188	-7.96549
218	124885	713.6	-9.45141	-7.90321
220	124922	718	-9.72005	-8.02352
222	124958	722.6	-9.3079	-7.79704
224	124995	716.6	-9.57631	-8.04187
226	125032	710.8	-9.41555	-7.5245
228	125069	704.8	-9.42887	-7.94433
230	125106	697	-9.52714	-8.01624
232	125143	687.2	-9.69959	-7.69894
234	125180	677.4	-9.34947	-7.86953
236	125216	667.6	-9.31239	-7.72125
238	125253	648.6	-9.56107	-7.67619
240	125290	629.6	-9.41919	-8.28242
242	125326	610.4	-9.69815	-7.64402
244	125363	587.6	-9.7286	-8.09124
246	125400	560.8	-9.80721	-7.82964
248	125437	534.2	-9.57338	-8.23727
250	125474	507.4	-9.41736	-7.89221
252	125506	524.4	-9.6676	-8.52024
254	125539	541.4	-9.80228	-7.94251
256	125572	557.4	-9.78711	-7.98294
258	125604	571.6	-9.8192	-8.10879
260	125636	586	-9.69045	-8.65202
262	125669	596.4	-9.22709	-7.87083
264	125701	605.6	-9.44469	-8.28301
266	125734	614.8	-9.53001	-7.89891
268	125766	622.4	-9.38255	-7.81894
270	125799	630.2	-9.63118	-8.32169
272	125832	634.4	-9.7114	-8.36332
274	125864	635.4	-9.38181	-8.01407
276	125896	636.2	-9.30502	-7.71523
278	125929	636	-9.55965	-8.40081
280	125961	635.6	-9.60107	-8.12933
282	125994	634.2	-9.63105	-7.88383
284	126026	629.2	-9.40535	-8.27196
286	126059	624.2	-9.54304	-7.98438
288	126092	618.8	-8.9934	-7.91195
290	126124	613	-9.44669	-7.67452
292	126156	607.2	-9.59595	-8.3319
294	126311	905.6	-9.38387	-7.92316
296	126466	1204.2	-9.37439	-8.15985
298	126621	1456	-9.38274	-8.5462
300	126776	1604.4	-9.21498	-8.49367
302	126931	1752.8	-9.26173	-8.48857
304	127087	1853.2	-9.38056	-8.47851
306	127244	1924.8	-9.4652	-8.49035
308	127400	1996.4	-9.23904	-7.86776
310	127554	2033.6	-9.34168	-8.36112
312	127708	2068.4	-9.35576	-8.31462
314	127862	2085.8	-9.25153	-7.98427
316	128016	2051	-9.51336	-7.93832
318	128171	2016	-9.22869	-7.56391
320	128326	1961.4	-8.87574	-7.67913
322	128482	1891.6	-9.26539	-8.0933
324	128638	1821.8	-9.27262	-8.16447
326	128793	1683.6	-9.32554	-8.3433
328	128948	1535.6	-9.14454	-8.39059
330	129103	1360.4	-9.1771	-7.7764
332	129257	1066.8	-8.69662	-7.91495
334	129412	773.4	-9.06801	-7.65687
336	129503	626.4	-8.82211	-8.08047
338	129531	625.8	-8.5648	-8.63664
340	129559	625.4	-8.56047	-8.52667
342	129587	625	-8.85995	-8.56678
344	129615	624.4	-9.03286	-8.45607
346	129642	623.2	-8.92783	-8.34983
348	129670	621.8	-8.93849	-8.29847
350	129697	620.6	-8.55787	-8.42359
352	129725	619.4	-8.55208	-8.40432
354	129752	615.8	-8.69862	-8.44609
356	129780	611.4	-8.38644	-8.56707
358	129807	607.2	-8.70554	-8.20749
360	129834	602.8	-8.80161	-8.46428
362	129862	597.8	-8.83589	-8.10849
364	129890	592.2	-9.0288	-8.14014
366	129917	586.4	-8.92262	-8.11463
368	129945	580.8	-8.43584	-8.20028
370	129972	575	-8.03224	-8.22175
	129982		-8.22452	-7.84897
	129992		-6.82781	-9.03598

## Sheet: OBI117
z (distance from top in mm)	Modelled age (year BP)	± 2σ (year BP)	δ13C	δ18O
0	116538	1184.8	-4.27566	-7.26441
0.2	116560	1173.6
0.4	116582	1162.6	-6.60101	-7.35135
0.6	116604	1151.6	-6.6483	-7.35144
0.8	116626	1140.4	-6.71468	-7.23519
1	116648	1129.2	-6.51701	-7.27668
1.2	116671	1118.2	-5.76592	-7.61996
1.4	116693	1107	-6.13272	-7.48811
1.6	116716	1095.8	-6.12732	-7.49995
1.8	116738	1084.6	-5.70242	-7.66177
2	116760	1073.4	-5.61738	-7.48739
2.2	116783	1062.2	-5.85893	-7.73673
2.4	116804	1051	-5.64754	-7.82545
2.6	116825	1039.8	-4.9906	-7.6446
2.8	116846	1028.6	-5.30467	-7.41467
3	116866	1017.4	-5.50046	-7.49476
3.2	116891	1013.2	-5.03297	-7.36171
3.4	116915	1008.8	-5.11781	-7.25904
3.6	116939	1004.6	-5.46884	-7.42882
3.8	116962	1000.6	-5.91952	-7.59265
4	116984	996.4	-6.36279	-7.68953
4.2	117007	992.4	-6.52967	-7.56441
4.4	117030	988.2	-6.47059	-7.69626
4.6	117053	984	-6.13026	-7.61183
4.8	117076	979.8	-6.08564	-7.54038
5	117098	975.6	-6.49788	-7.4418
5.2	117121	971.2	-6.96108	-7.28954
5.4	117143	966.8	-7.11678	-7.28193
5.6	117166	962.4	-6.69275	-7.38728
5.8	117188	958.2	-6.4975	-7.53216
6	117211	953.8	-6.92619	-7.70632
6.2	117234	949.4	-7.28877	-7.56687
6.4	117256	945.2	-7.53154	-7.71196
6.6	117279	940.8	-7.04544	-7.66148
6.8	117301	936	-6.48564	-7.54697
7	117324	931.4	-6.94878	-7.54646
7.2	117346	926.6	-7.91764	-7.56753
7.4	117369	922.2	-7.80625	-7.43873
7.6	117392	917.6	-7.72582	-7.35361
7.8	117415	913	-7.63176	-7.60319
8	117438	908.2	-7.76888	-7.5267
8.2	117460	903.4	-7.79537	-7.74355
8.4	117483	898.6	-7.76418	-7.97249
8.6	117505	894	-7.76613	-7.87923
8.8	117528	889.4	-8.16338	-7.66259
9	117551	884.6	-7.87567	-7.32705
9.2	117573	879.6	-7.94788	-7.32129
9.4	117596	874.6	-7.77979	-7.45386
9.6	117618	869.8	-7.38852	-7.73766
9.8	117641	865	-7.11312	-7.72424
10	117663	860.2	-7.09429	-7.8429
10.2	117686	855.2	-7.10097	-8.14103
10.4	117708	850	-7.32307	-8.11531
10.6	117731	844.8	-7.75376	-7.82643
10.8	117754	839.6	-8.00193	-7.86694
11	117777	834.4	-8.23016	-7.61221
11.2	117800	829.4	-8.08742	-7.5291
11.4	117822	824.2	-8.56804	-7.36675
11.6	117845	819	-8.69082	-7.69637
11.8	117868	813.6	-8.77443	-7.63251
12	117890	808.4	-8.78721	-7.60296
12.2	117913	803	-8.88125	-7.5724
12.4	117935	797.6	-8.91967	-7.5936
12.6	117958	792.2	-8.93975	-7.3827
12.8	117980	786.6	-9.0226	-7.40621
13	118003	781.2	-8.92089	-7.4571
13.2	118026	775.8	-8.86695	-7.64339
13.4	118048	770.4	-8.99277	-7.48931
13.6	118071	765	-9.11711	-7.59454
13.8	118093	759.4	-9.04214	-7.50313
14	118116	753.6	-8.96971	-7.3033
14.2	118138	747.8
14.4	118161	741.6	-8.94259	-7.25476
14.6	118184	735.2	-8.94232	-7.39469
14.8	118207	728.6	-8.96076	-7.27987
15	118230	722.4	-8.79915	-7.24543
15.2	118252	716.2	-8.94801	-7.39094
15.4	118275	710.2	-9.01382	-7.40079
15.6	118297	704	-8.90446	-7.45309
15.8	118320	698	-8.8763	-7.47191
16	118342	692	-8.81537	-7.28411
16.2	118365	685.6	-8.86307	-7.14232
16.4	118388	678.8	-8.96663	-7.28825
16.6	118410	672.2	-9.08428	-7.22025
16.8	118433	665.6	-8.76643	-7.21134
17	118455	659.2	-8.5503	-7.3239
17.2	118478	652.8	-8.86938	-7.39264
17.4	118501	646	-9.29365	-7.53343
17.6	118524	639	-9.3346	-7.79778
17.8	118546	632	-9.2899	-7.78453
18	118569	624.8	-9.27948	-7.72904
18.2	118592	617.4	-9.29632	-7.65051
18.4	118614	610	-8.84069	-7.69206
18.6	118637	602.4	-9.00268	-7.68789
18.8	118659	595	-9.15079	-7.67328
19	118682	587.6	-9.33514	-7.6903
19.2	118704	579.6	-9.30512	-7.72205
19.4	118727	571.4	-9.16033	-7.6346
19.6	118750	563.4	-9.09885	-7.22108
19.8	118772	555.2	-9.00693	-7.07365
20	118795	547	-8.8686	-7.19801
20.2	118817	538.8	-8.90688	-7.38715
20.4	118840	530.2	-8.8841	-7.2481
20.6	118863	521.4	-8.42741	-7.01478
20.8	118886	512.6	-8.82771	-7.43876
21	118909	503.6	-8.96749	-7.51185
21.2	118931	494.6	-8.66773	-7.30591
21.4	118954	485.6	-8.84815	-7.42689
21.6	118976	476	-8.87873	-7.36076
21.8	118999	466.4	-9.01179	-7.34362
22	119022	456.6	-8.85672	-7.47
22.2	119042	461.2	-8.78009	-7.50345
22.4	119062	465.6	-9.00103	-7.60122
22.6	119082	470.2	-8.94364	-7.57832
22.8	119103	474.4	-9.19571	-7.5726
23	119123	478.8	-9.19821	-7.5093
23.2	119143	483	-8.99092	-7.58875
23.4	119163	487	-9.14291	-7.48
23.6	119184	491	-9.22566	-7.66859
23.8	119204	494.6	-9.18956	-7.69369
24	119225	498.4	-9.17674	-7.48157
24.2	119245	502	-9.00542	-7.47884
24.4	119266	505.4	-8.94449	-7.45557
24.6	119286	508.8	-9.20646	-7.5997
24.8	119306	512.2	-9.17422	-7.58228
25	119326	515.2	-9.04683	-7.32098
25.2	119347	518.4	-8.92549	-7.28336
25.4	119367	521.4	-8.89113	-7.28527
25.6	119387	524.2	-8.99735	-7.38616
25.8	119408	527.2	-8.75643	-7.20043
26	119428	530	-8.73138	-7.13256
26.2	119448	532.6	-8.85338	-7.3458
26.4	119468	535.2
26.6	119489	537.8	-8.91459	-7.51184
26.8	119509	540.2	-8.94007	-7.18855
27	119529	542.6	-9.05068	-7.09473
27.2	119549	544.8	-9.05002	-7.23444
27.4	119570	547	-9.10887	-7.30791
27.6	119590	549.2	-8.97319	-7.1987
27.8	119610	551.2	-9.12485	-7.33782
28	119630	553.2	-9.0394	-7.49011
28.2	119651	555.2	-8.92996	-7.57592
28.4	119671	556.8	-8.70417	-7.24128
28.6	119691	558.6	-8.75966	-7.43177
28.8	119712	560.2	-8.85972	-7.48807
29	119732	561.8	-8.89561	-7.32311
29.2	119752	563.4	-8.86533	-7.55399
29.4	119772	564.8	-8.90353	-7.61127
29.6	119793	566.2	-8.94696	-7.6849
29.8	119813	567.4	-8.85792	-7.4972
30	119833	568.8	-8.76103	-7.58675
30.2	119854	570	-8.75062	-7.61058
30.4	119875	571.2	-8.64995	-7.59132
30.6	119895	572.2	-8.98115	-7.69976
30.8	119915	573.2	-8.98832	-7.46333
31	119934	574	-8.76725	-7.30816
31.2	119955	574.6	-8.78465	-7.22438
31.4	119976	575.4	-8.85464	-7.3137
31.6	119996	576	-8.76448	-7.41581
31.8	120017	576.6	-8.89126	-7.56421
32	120037	577	-8.80848	-7.69044
32.2	120057	577.6	-8.95335	-7.54115
32.4	120077	578	-8.62784	-7.30308
32.6	120098	578.4	-8.76885	-7.45146
32.8	120118	578.8	-8.98487	-7.83158
33	120138	578.8	-8.89205	-7.44526
33.2	120158	579	-8.96124	-7.27703
33.4	120179	579	-8.99236	-7.4045
33.6	120199	579	-9.06387	-7.51723
33.8	120219	579	-9.09873	-7.561
34	120240	579	-9.01351	-7.79832
34.2	120260	578.8	-9.0514	-7.77525
34.4	120280	578.6	-8.69267	-7.67579
34.6	120300	578.4	-8.82275	-7.811
34.8	120321	578	-8.84405	-7.58123
35	120341	577.6	-9.06636	-7.92377
35.2	120361	577.2	-9.03945	-7.74726
35.4	120381	576.8	-9.04937	-7.83139
35.6	120402	576.2	-8.91706	-7.77098
35.8	120422	575.4	-8.70769	-7.53527
36	120442	574.6	-8.78608	-7.36402
36.2	120463	573.6	-8.81209	-7.4482
36.4	120483	572.8	-8.45885	-7.4735
36.6	120504	571.8	-8.61661	-7.52596
36.8	120524	570.6	-8.49687	-7.4403
37	120544	569.6	-8.49863	-7.48043
37.2	120565	568.4	-8.44927	-7.33463
37.4	120585	567.2	-8.55191	-7.51472
37.6	120605	565.8	-8.61628	-7.77152
37.8	120626	564.6	-8.55225	-7.42967
38	120646	563	-8.36822	-7.27643
38.2	120666	561.6	-8.49027	-7.4362
38.4	120686	560	-8.56115	-7.4452
38.6	120707	558.4	-8.80234	-7.56352
38.8	120727	556.6	-8.68318	-7.72069
39	120747	554.8	-8.64973	-7.85616
39.2	120767	552.8	-8.59477	-7.77564
39.4	120788	551	-8.60501	-7.6977
39.6	120808	549	-8.70286	-7.54889
39.8	120828	546.8	-8.73965	-7.62288
40	120848	544.8	-8.84049	-7.77175
40.2	120871	558.6	-8.78463	-8.14644
40.4	120894	572.2	-8.72224	-8.09286
40.6	120917	586	-8.86919	-7.98643
40.8	120940	599.6	-8.91989	-7.83302
41	120962	613.2	-8.95289	-7.94523
41.2	120985	626.4	-8.81418	-7.75032
41.4	121008	639.4	-8.91781	-7.88991
41.6	121031	652.6	-9.01104	-7.90018
41.8	121054	665.8	-9.0139	-7.84387
42	121076	678.8	-8.9858	-7.83686
42.2	121712	677
42.4	122347	675
42.6	122983	673.2
42.8	123618	671.2
43	124254	669.4	-8.99735	-7.89054
43.2	124260	659.4	-8.95567	-7.65776
43.4	124268	649.4	-9.09411	-7.51658
43.6	124274	639.4	-8.92358	-7.77424
43.8	124282	629.4	-9.01891	-7.93702
44	124288	619.4	-9.05588	-8.0116
44.2	124295	610.2	-9.04423	-7.82501
44.4	124302	600.8	-8.91906	-7.69409
44.6	124309	591.6	-8.69626	-7.59867
44.8	124316	582.4	-8.86367	-7.66033
45	124322	573	-8.61474	-7.48765
45.2	124329	564.8	-9.59412	-7.99531
45.4	124336	556.4	-9.95329	-8.16364
45.6	124343	548.2	-9.96063	-7.95495
45.8	124350	539.8	-10.0674	-7.78757
46	124356	531.6	-9.88232	-7.86268
46.2	124363	524.4	-9.84613	-7.82773
46.4	124370	517.2	-9.85186	-7.83564
46.6	124377	510	-9.83114	-7.8399
46.8	124384	502.6	-9.73418	-8.08797
47	124390	495.4	-9.91485	-8.11544
47.2	124396	492.6	-10.0196	-8.13604
47.4	124401	489.8	-9.92564	-8.02707
47.6	124406	487.2	-10.1601	-7.83006
47.8	124412	484.8	-9.98065	-7.90581
48	124417	482.4	-10.0609	-7.82567
48.2	124422	480.2	-10.1398	-7.71806
48.4	124428	478	-10.087	-7.9921
48.6	124433	476	-10.1476	-7.85615
48.8	124438	474.2	-10.2614	-7.93583
49	124444	472.6	-10.2286	-7.78185
49.2	124449	471	-10.3032	-7.95663
49.4	124454	469.6	-10.2304	-8.0382
49.6	124460	468.2	-10.2149	-8.12892
49.8	124465	466.8	-10.2292	-8.02871
50	124470	465.8	-10.3333	-8.52514
50.2	124476	464.8	-10.3794	-8.41594
50.4	124481	463.8	-10.0799	-8.1591
50.6	124486	463.2	-9.90482	-8.29929
50.8	124492	462.6	-9.8745	-8.35168
51	124497	462	-9.92057	-8.19308
51.2	124502	461.8	-9.92045	-8.35496
51.4	124508	461.8	-10.1223	-8.354
51.6	124513	461.6	-10.0017	-8.09824
51.8	124518	461.8	-10.1607	-8.28303
52	124524	461.8	-9.87023	-8.29791
52.2	124529	462.2	-10.0634	-8.38881
52.4	124534	462.8	-9.98259	-8.21232
52.6	124540	463.2	-9.96919	-8.12019
52.8	124545	464	-9.9001	-8.08132
53	124550	465	-9.66061	-7.98034
53.2	124556	465.8	-9.64954	-8.03397
53.4	124561	467	-9.56549	-8.03412
53.6	124566	468.2	-9.90981	-7.8659
53.8	124572	469.6	-10.0632	-8.01869
54	124577	471.2	-9.9875	-8.33185
54.2	124582	472.6	-10.1204	-8.52448
54.4	124588	474.4	-10.2926	-8.74606
54.6	124593	476.4	-10.3075	-8.91393
54.8	124598	478.4	-10.3881	-8.58249
55	124604	480.4	-10.0592	-8.62154
55.2	124609	482.8	-10.2522	-8.60315
55.4	124614	485	-10.4481	-8.51356
55.6	124620	487.8	-10.4485	-8.57629
55.8	124625	490.4	-10.5311	-8.55621
56	124630	493.2	-10.4965	-8.32606
56.2	124638	500.2	-10.589	-8.31672
56.4	124644	507.4	-10.588	-8.507
56.6	124652	514.4	-10.2255	-8.43422
56.8	124658	521.6	-10.1311	-8.18696
57	124666	528.6	-10.3484	-8.11618
57.2	125311	607.6
57.4	125956	686.6
57.6	126602	765.8
57.8	127247	844.8
58	127892	923.8	-9.96157	-7.82772
58.2	127907	907.2	-9.97153	-7.78425
58.4	127922	890.4	-10.0458	-7.84362
58.6	127936	873.8	-10.1979	-8.19021
58.8	127951	857.2	-10.1865	-8.10783
59	127966	840.6	-9.96029	-8.09956
59.2	127978	832	-10.1993	-8.49344
59.4	127990	823.6	-10.2792	-8.59158
59.6	128002	815.2	-10.4812	-8.56022
59.8	128015	806.6
60	128027	798.6	-10.3428	-8.59997
60.2	128040	790.6	-10.3034	-8.71874
60.4	128052	782.6	-10.3469	-8.28436
60.6	128065	774.6	-10.0456	-7.80143
60.8	128078	767.2	-10.1885	-8.04182
61	128090	759.8	-10.2364	-8.21784
61.2	128103	752.4	-10.3484	-7.97023
61.4	128115	745.2	-10.3069	-8.28773
61.6	128128	738.2	-10.3022	-8.25203
61.8	128140	731.2	-10.1627	-8.04624
62	128152	724.4	-9.98531	-8.1547
62.2	128164	717.4	-9.9079	-8.2331
62.4	128177	711.2	-9.86836	-8.0745
62.6	128190	705	-10.0071	-8.30867
62.8	128202	698.8	-9.47693	-8.03408
63	128215	692.6	-9.17607	-7.93095
63.2	128227	687	-9.06519	-7.86207
63.4	128239	681.4	-9.03645	-8.02974
63.6	128252	676	-9.11659	-8.20782
63.8	128264	670.4	-9.40627	-8.0306
64	128276	665.4	-9.42087	-7.78957
64.2	128289	660.8	-9.34041	-7.89551
64.4	128302	656	-9.05579	-8.09713
64.6	128314	651.2	-8.18712	-8.06013
64.8	128326	647	-8.79603	-8.47651
65	128339	643.2	-9.00989	-8.56434
65.2	128351	639.2	-8.90986	-8.89917
65.4	128363	635.4	-9.0448	-8.91357
65.6	128376	632	-9.02654	-8.41463
65.8	128388	629	-8.91997	-8.05923
66	128401	626	-9.02345	-8.44716
66.2	128413	623.2	-9.03338	-8.46209
66.4	128426	620.6	-9.0668	-8.156
66.6	128438	618.8	-9.05565	-8.33298
66.8	128450	616.8	-9.13357	-8.67799
67	128463	615	-9.09516	-8.46738
67.2	128475	613.4	-8.99708	-8.41202
67.4	128488	612.4	-8.96783	-8.53378
67.6	128500	611.6	-8.94042	-8.7117
67.8	128513	610.6	-9.02726	-8.47856
68	128525	610	-9.18092	-8.14576
68.2	128538	610	-9.24238	-8.28193
68.4	128550	610.2	-9.05041	-8.44324
68.6	128563	610.2	-8.96928	-8.76668
68.8	128576	610.6	-8.9476	-8.93229
69	128588	611.6	-9.07231	-8.93629
69.2	128600	612.8	-9.12176	-8.60887
69.4	128612	614	-9.03098	-8.00479
69.6	128625	615.4	-8.90798	-7.9945
69.8	128637	617.6	-9.03918	-8.0424
70	128650	619.8	-8.95641	-8.36457
70.2	128662	622	-9.02945	-8.65833
70.4	128675	624.2	-8.85354	-7.86842
70.6	128687	627.4	-9.18145	-8.29382
70.8	128700	630.6	-9.49618	-8.68667
71	128712	633.8	-9.51046	-8.22881
71.2	128724	637	-9.60301	-8.04022
71.4	128737	641.2	-9.64425	-8.40177
71.6	128749	645.4	-9.28835	-8.76939
71.8	128762	649.4	-9.44697	-8.70529
72	128774	653.6	-9.40974	-8.33993
72.2	128789	666.2	-9.5397	-8.57991
72.4	128803	679	-9.63315	-8.46785
72.6	128817	691.6	-9.63262	-8.45718
72.8	128831	704.2	-9.79935	-8.3483
73	128846	716.8	-9.86891	-8.13297
73.2	128860	730.6	-9.74178	-7.92127
73.4	128874	744.4	-8.84987	-7.86131
73.6	128888	758.2	-7.66898	-9.424
73.8	128902	772	-7.75169	-10.3893
74	128916	785.6	-7.77156	-10.2369
74.2	129190	816.4
74.4	129464	847.2
74.6	129737	878
74.8	130011	908.8	-8.06717	-10.4414
75	130284	939.4	-7.82887	-10.118
75.2	130372	865.2	-7.92192	-10.0343
75.4	130459	791	-7.9159	-10.1056
75.6	130546	716.6	-7.78782	-10.374
75.8	130633	642.4	-7.67224	-10.5002
76	130720	568.2	-7.68027	-10.1692
76.2	130740	571.4	-7.83821	-10.4206
76.4	130758	574.8	-7.85317	-10.6131
76.6	130777	578.2	-7.81963	-10.2955
76.8	130796	581.6	-8.25967	-10.6466
77	130816	584.8	-8.47787	-10.4593
77.2	130835	588	-8.50089	-10.5506
77.4	130854	591.2	-8.50939	-10.7441
77.6	130873	594.6	-8.52205	-10.4197
77.8	130892	597.6	-8.59041	-10.3947
78	130911	600.6	-8.25379	-10.4972
78.2	130930	603.4	-8.26861	-10.6574
78.4	130949	606.4	-8.29324	-10.6016
78.6	130968	609.2	-8.18196	-10.8801
78.8	130987	612	-8.01139	-10.7133
79	131006	614.8	-8.14282	-10.3473
79.2	131025	617.6	-8.29199	-10.1365
79.4	131044	620.2	-8.08465	-10.5543
79.6	131063	622.8	-7.83394	-10.3179
79.8	131082	625.2	-8.18244	-10.4716
80	131101	627.8	-8.13459	-10.241
80.2	131120	630.4	-8.15199	-10.515
80.4	131139	632.6	-8.34631	-10.801
80.6	131158	635	-8.43886	-11.0385
80.8	131177	637.4	-8.37618	-10.3629
81	131196	639.8	-8.28261	-10.893
81.2	131214	641.8	-8.36303	-10.5986
81.4	131234	644	-8.39682	-10.3659
81.6	131252	646.2	-8.18621	-10.4615
81.8	131271	648.2	-8.33762	-10.4811
82	131290	650.4	-8.39226	-10.1334
82.2	131309	652.2	-8.31497	-10.7946
82.4	131328	654.2	-8.06475	-10.6812
82.6	131347	656.2	-8.07441	-10.6938
82.8	131366	658	-8.03354	-10.5384
83	131386	659.8	-8.1401	-10.9633
83.2	131405	661.6	-8.25802	-11.0319
83.4	131424	663.4	-8.41171	-10.9122
83.6	131443	665.2	-8.33392	-10.7212
83.8	131462	666.8	-8.29311	-10.2841
84	131481	668.4	-8.40688	-10.2738
84.2	131500	669.8	-8.25674	-10.3418
84.4	131519	671.4	-8.18882	-10.5617
84.6	131538	673	-8.23382	-10.009
84.8	131557	674.4	-8.38132	-10.5403
85	131576	675.8	-8.1636	-10.4968
85.2	131595	677.2	-8.13387	-10.4308
85.4	131614	678.6	-8.36132	-10.8866
85.6	131633	680	-8.43638	-10.7326
85.8	131652	681.4	-8.40095	-10.7988
86	131671	682.6	-8.40851	-10.8134
86.2	131690	683.8	-8.25012	-10.8947
86.4	131709	685	-8.31361	-10.4595
86.6	131728	686	-8.35169	-10.5229
86.8	131746	687	-8.3244	-10.6185
87	131766	688.2	-8.11879	-10.5281
87.2	131784	689	-8.26585	-10.2792
87.4	131803	690	-8.32167	-10.1121
87.6	131822	691	-8.29926	-10.6075
87.8	131841	692	-8.167	-10.2811
88	131860	692.8	-7.93857	-10.586
88.2	131879	693.6
88.4	131898	694.4	-7.91846	-10.0824
88.6	131917	695.2	-7.91005	-10.6705
88.8	131936	695.8	-7.88297	-10.2894
89	131956	696.4	-8.1713	-9.97862
89.2	131975	697.2	-8.27176	-10.3539
89.4	131994	697.8	-8.17356	-9.93453
89.6	132013	698.4	-7.92756	-10.4149
89.8	132032	698.8	-7.93082	-10.0807
90	132051	699.2	-7.99909	-9.94499
90.2	132070	699.8	-7.95046	-10.0104
90.4	132089	700.2	-8.16986	-10.4045
90.6	132108	700.4	-8.17758	-10.151
90.8	132127	700.6	-8.06567	-10.6148
91	132146	701	-8.17638	-10.291
91.2	132165	701.2	-8.35512	-10.0645
91.4	132184	701.4	-8.41194	-10.6005
91.6	132203	701.6	-8.31604	-10.7276
91.8	132222	701.8	-8.15247	-10.0602
92	132240	702	-8.10144	-10.6387
92.2	132260	702	-7.81044	-10.0434
92.4	132278	702	-7.91726	-9.9283
92.6	132297	702	-8.00115	-10.3362
92.8	132316	701.8	-8.01706	-10.1998
93	132336	701.8	-8.03632	-9.96636
93.2	132355	701.6	-8.03071	-10.0166
93.4	132374	701.4	-8.11751	-10.5115
93.6	132393	701.2	-8.01001	-10.021
93.8	132412	701	-7.9856	-9.88216
94	132431	700.8	-7.95642	-10.3822
94.2	132450	700.6
94.4	132469	700.4	-7.79421	-9.86534
94.6	132488	700	-7.70481	-9.54517
94.8	132507	699.6	-7.78045	-9.63437
95	132526	699.2	-7.86479	-9.61848
95.2	132545	698.8	-7.77002	-9.81299
95.4	132564	698.4	-7.58715	-9.99856
95.6	132583	697.8	-7.84834	-9.91302
95.8	132602	697.2	-7.87887	-9.73627
96	132621	696.6	-7.82115	-10.0123
96.2	132640	696	-7.76018	-10.3177
96.4	132659	695.4	-7.84224	-10.3882
96.6	132678	694.6	-7.8176	-10.2149
96.8	132697	693.8	-7.75835	-10.4129
97	132716	693.2	-7.81566	-10.064
97.2	132735	692.4	-7.75938	-9.91235
97.4	132754	691.4	-7.88461	-10.2726
97.6	132772	690.6	-7.9404	-10.5934
97.8	132792	689.6	-7.95621	-10.359
98	132810	688.6	-7.56491	-10.3341
98.2	132830	687.6	-7.18772	-9.7398
98.4	132849	686.6	-7.39122	-10.2514
98.6	132868	685.4	-7.27582	-10.3057
98.8	132887	684.4	-7.17155	-10.1325
99	132906	683.2	-7.09293	-10.0019
99.2	132925	682	-7.11616	-9.64571
99.4	132944	680.8	-7.42626	-9.77054
99.6	132963	679.6	-7.45393	-9.57511
99.8	132982	678.2	-7.50362	-9.83355
100	133001	677	-7.64121	-10.3078
100.2	133020	675.6	-7.65508	-10.203
100.4	133039	674.2	-7.67901	-10.4463
100.6	133058	672.8	-7.69395	-9.93726
100.8	133077	671.2	-7.61962	-9.35441
101	133096	669.6	-7.63879	-9.20453
101.2	133115	668.2	-7.57611	-9.38541
101.4	133134	666.6	-7.60189	-9.50872
101.6	133153	664.8	-7.30338	-9.7935
101.8	133172	663.2	-7.21795	-9.63311
102	133192	661.6	-7.67676	-9.93505
102.2	133210	659.8	-7.45672	-9.45938
102.4	133228	658
102.6	133246	656.2	-7.70859	-9.23582
102.8	133264	654.4	-7.73163	-9.56891
103	133282	652.6	-7.36848	-9.61536
103.2	133310	658.4	-7.60459	-9.64696
103.4	133338	664.2	-7.66025	-9.68508
103.6	133365	670	-7.5738	-9.77934
103.8	133393	675.8	-7.49768	-10.0086
104	133420	681.2	-7.17262	-9.5327
104.2	133446	686.4	-7.27623	-9.66325
104.4	133473	691.6	-7.3706	-10.1393
104.6	133499	697	-7.33702	-10.0523
104.8	133526	701.6	-7.39611	-10.0544
105	133552	706.2	-7.38473	-9.83776
105.2	133579	711	-7.47928	-10.123
105.4	133606	715.6	-7.55888	-9.86197
105.6	133632	719.8	-7.42339	-9.55272
105.8	133659	723.8	-7.26828	-9.72726
106	133685	728	-7.11421	-9.69188
106.2	133712	732	-7.34437	-9.93339
106.4	133738	735.8	-7.39891	-9.90096
106.6	133765	739.4	-7.50823	-9.8288
106.8	133792	743.2	-7.21123	-9.47826
107	133818	746.8	-7.19382	-9.95755
107.2	133845	750.2	-7.17563	-9.47509
107.4	133872	753.6	-7.2953	-9.74505
107.6	133899	756.8	-7.28206	-9.62841
107.8	133925	760.2	-7.30473	-10.1855
108	133952	763.2	-7.28438	-10.054
108.2	133979	765.8	-7.20725	-9.85303
108.4	134005	768.4	-7.25921	-9.72519
108.6	134032	771.2	-7.29367	-9.68851
108.8	134058	773.8	-6.90118	-9.48156
109	134085	776.2	-7.01949	-9.61897
109.2	134112	778.6	-6.80606	-9.50754
109.4	134138	781	-6.83071	-9.06822
109.6	134165	783.2	-6.95824	-9.39506
109.8	134191	785.2	-7.00335	-9.37438
110	134218	787.2	-6.75662	-9.07616
110.2	134245	789.2	-6.88352	-9.26912
110.4	134271	791	-6.91204	-9.48662
110.6	134298	792.6	-6.85893	-9.26438
110.8	134324	794.2
111	134351	795.8	-6.59744	-9.10152
111.2	134378	797.4	-6.49559	-9.57874
111.4	134404	798.6	-6.29105	-9.51286
111.6	134431	799.8	-6.24038	-9.49644
111.8	134457	801.2	-6.29079	-9.59383
112	134484	802.2	-6.25907	-9.1394
112.2	134510	803.2	-6.29624	-9.13843
112.4	134537	804	-6.50799	-9.46698
112.6	134564	805	-6.79931	-9.7901
112.8	134590	805.8	-6.76033	-9.18289
113	134617	806.4	-6.79816	-9.01606
113.2	134643	806.8	-6.91867	-9.5313
113.4	134670	807.4	-6.94823	-9.48036
113.6	134697	807.8	-6.92666	-9.48398
113.8	134723	808	-6.95521	-9.33226
114	134750	808.2	-6.82054	-9.10844
114.2	134777	808.4	-6.76258	-9.30788
114.4	134804	808.6	-6.85821	-9.09438
114.6	134830	808.4	-6.81881	-8.79605
114.8	134856	808.2	-6.64748	-8.66621
115	134883	808	-6.83263	-8.89589
115.2	134909	807.6	-6.81265	-9.22862
115.4	134936	807.4	-6.80372	-8.88574
115.6	134963	807	-6.82897	-9.10201
115.8	134990	806.6	-6.95667	-9.28127
116	135016	806.2	-6.80557	-9.21755

## Sheet: OBI118
z (distance from top in mm)	Modelled age (year BP)	± 2σ (year BP)	δ13C	δ18O
0	115306	635.2	-4.35923	-7.50675
1	115384	615.8	-5.02503	-7.37888
2	115462	596.4	-5.87385	-7.53012
3	115540	577	-6.81267	-7.71385
4	115618	557.2	-6.90608	-7.54692
5	115695	554	-7.12064	-7.62537
6	115774	550.6	-7.26058	-7.52241
7	115851	546.4	-7.68272	-7.47163
8	115929	542.2	-8.06172	-7.5355
9	116006	537.4	-7.95007	-7.25308
10	116085	532.4	-7.08558	-7.76066
11	116163	526.6	-8.14248	-7.57483
12	116232	520.6	-7.72937	-7.36771
13	116358	514	-8.89042	-7.72679
14	116475	507	-8.64511	-7.46856
15	116593	499.4	-9.01371	-7.6269
16	116710	491.4	-8.79407	-7.28976
17	116827	482.8	-9.05322	-7.3428
18	116945	473.6	-8.7235	-7.51331
19	117062	463.8	-9.007	-7.37179
20	117180	453.6	-9.07226	-7.34898
21	117297	442.2	-8.9897	-7.2077
22	117414	430.6	-8.80845	-7.3585
23	117531	418.2	-8.78548	-7.3004
24	117649	425	-8.72401	-7.33554
25	117767	431.4	-8.9858	-7.17307
26	117884	437.2	-8.99882	-7.15808
27	118001	442	-9.21314	-7.44992
28	118119	445.8	-9.26924	-7.54359
29	118236	448.8	-9.17105	-7.22308
30	118353	451.2	-9.08247	-7.30961
31	118470	453	-9.25658	-7.14331
32	118588	453.8	-9.12552	-7.34559
33	118706	454	-9.08226	-7.28957
34	118822	453.2
35	118940	451.6
36	119057	449.4	-9.26303	-7.27301
37	119174	446.4	-9.02703	-7.30028
38	119292	442.8	-8.96819	-7.26482
39	119410	438	-8.92308	-7.27824
40	119526	432.8	-8.80584	-7.2832
41	119575	432.2	-8.8657	-7.27544
42	119624	432	-8.87476	-7.55338
43	119672	432	-9.06924	-7.55253
44	119720	431.8	-9.13037	-7.54761
45	119768	431.6	-9.33684	-7.29773
46	119818	431.4	-9.3998	-7.53581
47	119866	431.2	-8.95351	-7.62256
48	119914	431	-9.10449	-7.45306
49	119962	430.6	-9.24596	-7.5448
50	120012	430.2	-9.137	-7.47874
51	120060	429.8	-9.19899	-7.64206
52	120108	429.4	-9.11577	-7.54596
53	120156	428.8	-9.28405	-7.8133
54	120205	428.4	-9.17056	-7.40412
55	120254	428	-9.08904	-7.5706
56	120302	427.4	-8.91342	-7.51999
57	120350	427	-8.99454	-7.47843
58	120398	426.4	-8.93879	-7.21689
59	120447	425.6	-9.2325	-7.31708
60	120496	424.8	-9.27155	-7.38209
61	120544	424.2	-9.38596	-7.28109
62	120592	423.4	-9.40305	-7.36406
63	120640	422.6	-9.1759	-7.29592
64	120690	421.6	-9.24613	-7.34775
65	120738	420.8	-9.43665	-7.5838
66	120786	419.8	-9.04882	-7.43325
67	120834	419	-9.11416	-7.29991
68	120884	418	-9.12929	-7.12894
69	120932	417	-9.24257	-7.10045
70	120980	415.6	-9.33869	-7.47241
71	121028	414.4	-9.11991	-7.39392
72	121077	413.2	-9.41019	-7.65808
73	121126	412.2	-9.0876	-7.63486
74	121174	410.8	-9.72332	-7.81052
75	121222	409.6	-9.49139	-7.7569
76	121272	408.8	-9.22572	-7.46758
77	121331	415.8	-8.98664	-7.32332
78	121391	422.6	-9.03491	-7.75912
79	121451	429.2	-9.20128	-7.55349
80	121511	435.6	-9.10528	-7.70246
81	121570	441.8	-9.03678	-7.7538
82	121770	408.4	-9.01851	-7.54884
83	121798	403	-9.20548	-7.60503
84	121826	397.4	-9.2402	-7.6155
85	121854	392	-9.14083	-7.55046
86	121883	386.4	-9.14609	-7.60743
87	121912	381	-9.03563	-7.54686
88	121936	374.8	-9.22155	-7.76341
89	121972	373	-9.18839	-7.92224
90	122004	370.6	-9.45896	-7.63668
91	122036	368	-9.47825	-7.82548
92	122068	365.4	-9.06731	-7.7369
93	122100	363	-9.16626	-7.43999
94	122132	360.4	-9.05366	-7.64364
95	122164	358	-9.11675	-7.66805
96	122196	355.6	-9.10604	-7.4515
97	122228	353.2	-8.9782	-7.37316
98	122260	350.8	-9.08784	-7.61149
99	122292	348.4	-9.39482	-7.56971
100	122324	346	-9.38877	-7.52661
101	122356	343.4	-9.3987	-7.8
102	122388	341.2	-9.34986	-7.78679
103	122420	338.6	-9.34351	-7.59331
104	122452	336.2	-9.41059	-7.51313
105	122484	333.6	-9.25348	-7.4037
106	122516	331	-9.4419	-7.59567
107	122549	328.4	-9.52103	-7.75742
108	122582	326	-9.10687	-7.4701
109	122614	323.6	-9.42573	-7.69288
110	122646	321.2
111	122678	318.8	-9.35705	-7.70425
112	122710	316.4	-9.55294	-7.72202
113	122742	314	-9.36582	-7.85475
114	122774	311.6	-9.3051	-7.81693
115	122806	309.2	-9.25946	-7.75032
116	122838	306.6	-9.27039	-7.66605
117	122870	304.2	-9.31441	-7.81855
118	122902	301	-9.43577	-7.71457
119	122934	302.2	-9.43087	-7.74446
120	122966	302.8	-9.79647	-7.68626
121	122998	303	-9.47542	-7.4914
122	123030	303.6	-9.31242	-7.69711
123	123062	304	-9.5984	-7.44221
124	123094	304.4	-9.42377	-7.6227
125	123126	304.8	-9.44545	-7.73153
126	123159	305.2	-9.46124	-7.4156
127	123192	305.6	-9.46411	-7.46095
128	123224	305.8	-9.31827	-7.47269
129	123256	306.2	-9.41203	-7.71008
130	123288	306.6	-9.50025	-7.33161
131	123320	307	-9.68353	-7.58974
132	123352	307.4	-9.50258	-7.54017
133	123384	307.8	-9.53932	-8.00744
134	123414	307.2	-9.2641	-7.79995
135	123449	313	-9.40217	-7.85085
136	123482	317.8
137	123515	322.6	-9.57177	-7.60917
138	123548	327.4
139	123580	332.2	-9.54974	-7.49563
140	123613	336.8	-9.47371	-7.57714
141	123646	341.6	-9.37115	-7.49444
142	123678	346.4	-9.45828	-7.56563
143	123711	351	-9.47893	-7.55052
144	123744	355.8	-9.19051	-7.54125
145	123777	360.6	-9.22252	-7.3715
146	123809	365.2	-9.1872	-7.39735
147	123842	370.2	-9.7737	-7.50751
148	123875	374.8	-9.37726	-7.81066
149	123909	379.8	-9.7689	-7.77456
150	123941	384.6
151	123974	389.4	-9.91788	-7.71598
152	124007	394.2	-9.52247	-7.68866
153	124040	398.8	-9.35934	-7.76589
154	124072	403.6
155	124105	408.2	-9.41994	-7.58787
156	124138	413	-9.63149	-7.40958
157	124171	417.8	-9.78782	-7.55776
158	124203	422.6	-9.45365	-7.57742
159	124236	427.2	-9.55113	-7.28978
160	124269	431.8	-9.69483	-7.98058
161	124302	436.6	-9.52541	-7.72195
162	124335	441.4	-9.62525	-7.50769
163	124368	446.2	-9.6354	-7.67853
164	124401	451
165	124434	455.8
166	124466	460.6	-9.63867	-7.82812
167	124499	465.4	-9.73595	-7.75443
168	124532	470.2	-10.0413	-7.73605
169	124564	475	-9.68631	-7.45026
170	124597	479.8	-9.98595	-7.75041
171	124630	484.6	-9.53081	-7.83253
172	124663	489.2	-9.39184	-7.78415
173	124696	494	-9.83013	-7.71817
174	124728	498.8	-9.59911	-7.4146
175	124761	503.6	-9.56397	-7.54281
176	124794	508.4	-9.51098	-7.68256
177	124826	512.6	-9.62082	-7.67122
178	124856	519.8	-9.36517	-7.75817
179	124884	526.2	-9.83471	-7.89341
180	124913	532.8	-9.70073	-7.60831
181	124942	539.4	-9.43495	-7.79275
182	124971	546	-9.38621	-7.99994
183	125000	552.6	-9.40359	-7.95699
184	125028	559.2	-9.6334	-7.86466
185	125057	565.8
186	125086	572.4
187	125115	578.8	-9.79077	-7.63088
188	125144	585.4	-9.48088	-7.84516
189	125173	592	-9.61844	-8.04918
190	125201	598.6	-9.36505	-7.82886
191	125230	605.4	-9.38309	-7.64458
192	125259	612	-9.42233	-7.68263
193	125288	618.6	-9.45542	-7.7871
194	125317	625	-9.52585	-7.95077
195	125345	631.6	-9.79912	-7.8577
196	125374	638.2	-10.088	-7.85326
197	125402	645	-9.51585	-7.66376
198	125432	651.8	-9.55202	-7.9099
199	125460	658.2	-9.5636	-8.1058
200	125489	665	-9.85756	-8.04764
201	125518	671.6	-9.72035	-7.86514
202	125546	678.2	-9.29772	-8.08011
203	125575	685	-9.2755	-8.07014
204	125604	691.6	-9.10452	-7.69874
205	125633	698.2	-9.21985	-7.81226
206	125662	704.8	-9.34615	-7.68944
207	125691	711.4	-9.12367	-7.66118
208	125719	718	-9.15627	-7.88844
209	125748	724.8	-8.94551	-7.62686
210	125777	731.4	-9.03347	-7.47647
211	125806	738	-9.26234	-7.68527
212	125835	744.6	-9.02172	-7.77194
213	125864	751.2	-9.03343	-7.85338
214	125893	757.8	-9.33449	-7.86161
215	125922	764.2	-9.1398	-7.8794
216	125950	770.8	-9.22781	-7.87299
217	125979	777.4	-8.95496	-7.94844
218	126008	784	-9.22659	-8.04083
219	126032	780.2	-9.23217	-7.93689
220	126068	800	-8.89404	-7.87498
221	126099	809.2	-8.711	-7.63101
222	126130	818.4	-8.82147	-7.95878
223	126162	827.4	-8.77909	-7.9884
224	126193	836.6	-8.78689	-8.01275
225	126224	845.8	-8.9319	-8.11599
226	126256	854.8	-8.72038	-7.92947
227	126288	864	-8.80009	-7.99804
228	126318	873.2	-9.01244	-8.20745
229	126350	882.4	-9.04807	-7.9433
230	126381	891.6	-8.96979	-8.0115
231	126412	900.8	-8.90303	-8.16823
232	126444	910	-8.8601	-8.0527
